# Supplementary material for: A Toolbox for Diverse Oxyfunctionalisation of Monoterpenes
Source: PubMed Central journal article supplement (PMC6158249; doi:10.1038/s41598-018-32816-1), 2018-09-26
Supplement: 41598_2018_32816_MOESM1_ESM.pdf [file 41598_2018_32816_MOESM1_ESM.pdf]

# A Toolbox for Diverse Oxyfunctionalisation of Monoterpenes

Aitor Hernandez-Ortega, Maria Vinaixa, Ziga Zebec, Eriko Takano, Nigel S. Scrutton

## Supplementary Information

### Supplementary Results

Additional Information from the screening studies:

- **Supplementary Figures S1-15**: substrate conversion by sample
- **Supplementary Tables S1-15**: detailed product information

**Supplementary Table S16**: Mass Spectra of non-identified products.

**Supplementary Table S17**: Authentic standards used listed by retention time.

**Supplementary Table S18**: Product identification against NIST MS library and/or authentic standards.

### Supplementary Methods

**Supplementary Table S19**: Basic information about primers.

**Supplementary Table S20**: Primers sequences.

**Supplementary Figure S16**: pJBEI-6411 construct map.

## Supplementary Results

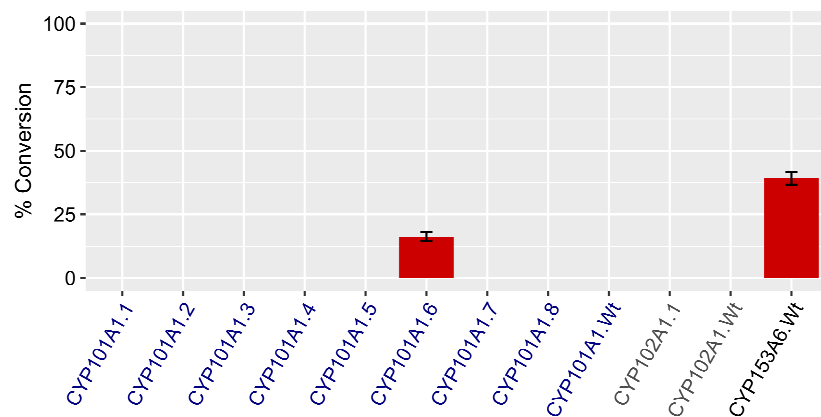

**Supplementary Figure S1. Conversion % of (+/-)-Linalool (1) by CYPs library.**  
Mean and standard deviation (error bars) shown.

| Supplementary Table S1. Products formed after conversion of (+/-)-Linalool (1) by CYPs library |                                              |       |      |                        |             |  |
|------------------------------------------------------------------------------------------------|----------------------------------------------|-------|------|------------------------|-------------|--|
| Name (number)                                                                                  | SMILES                                       | RT    | RI   | Normalised area (x100) |             |  |
|                                                                                                |                                              |       |      | CYP101A1.6             | CYP153A6.Wt |  |
| <i>cis</i> -Linalool oxide (19)                                                                | <chem>C[C@]1(CC[C@@H](O1)C(C)(C)O)C=C</chem> | 9.04  | 1468 | 41.1±2.9               | 1.5±0.1     |  |
| <i>trans</i> -Linalool oxide (18)                                                              | <chem>C[C@]1(CC[C@H](O1)C(C)(C)O)C=C</chem>  | 9.28  | 1621 | 24.3±2.4               | 1.8±0.1     |  |
| Dihydrolinalool (17)                                                                           | <chem>CCC(C)(CCC=C(C)C)O</chem>              | 9.76  | 1546 | 6.4±0.3                | 4.7±0.2     |  |
| <i>cis</i> -Pyranoid linalool oxide (-)                                                        | <chem>CC1(C(CCC(O1)(C)C=C)O)C</chem>         | 10.96 | 1764 | 6.9±0.5                |             |  |
| <i>trans</i> -Pyranoid linalool oxide (-)                                                      | <chem>CC1(C(CCC(O1)(C)C=C)O)C</chem>         | 11.07 | 1859 | 5.3±0.4                |             |  |
| 8-Hydroxylinalool (16)                                                                         | <chem>CC(=CCCC(C)(C=O)CO</chem>              | 13.29 | 2000 | 10.4±3.5               | 231.6±9.6   |  |

RT: Retention time (minutes). RI: Retention index. Normalised area (x100): (mean± s.d.) calculated as described in the methods section.

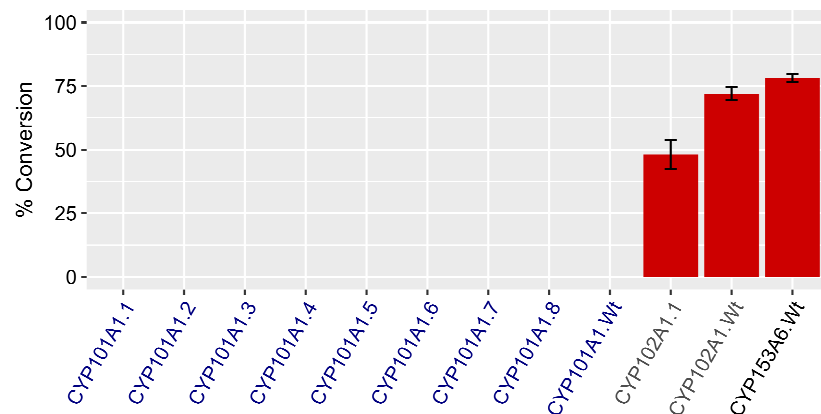

**Supplementary Figure S2. Conversion % of (E/Z)-β-Ocimene (2) by CYPs library.** Mean and standard deviation (error bars) shown.

| Name (number)                                           | SMILES                                | RT    | RI   | Normalised area (x100) |             |             |
|---------------------------------------------------------|---------------------------------------|-------|------|------------------------|-------------|-------------|
|                                                         |                                       |       |      | CYP102A1.1             | CYP102A1.Wt | CYP153A6.Wt |
| (Z)-Myroxide ( <b>22</b> )                              | <chem>C/C(=C/CC1C(O1)(C)C)/C=C</chem> | 9.24  | 1582 | 0.5±0.1                | 9.6±0.7     |             |
| (E)-Myroxide ( <b>21</b> )                              | <chem>C/C(=C\C1C(O1)(C)C)/C=C</chem>  | 9.40  | 1884 | 1.4±0.1                | 10.0±0.6    | 0.4±0.0     |
| (3E,5E)-2,6-Dimethyl-3,5,7-octatrien-2-ol ( <b>20</b> ) | <chem>CC(=CC=CC(C)(C)O)C=C</chem>     | 11.32 | 1817 | 11.4±1.3               | 2.6±0.1     | 14.0±0.9    |
| Oci ( <b>u5</b> )                                       |                                       | 12.12 | 4973 |                        |             | 64.7±2.6    |
| Oci ( <b>u4</b> )                                       |                                       | 12.26 | 2000 | 2.8±0.3                |             | 175.7±18.6  |
| Oci ( <b>u3</b> )                                       |                                       | 12.89 | 2000 | 2.2±0.1                | 17.3±2.4    |             |
| Oci ( <b>u2</b> )                                       |                                       | 13.43 | 2000 | 23.4±1.2               | 12.4±0.6    | 13.4±0.4    |
| Oci ( <b>u1</b> )                                       |                                       | 13.81 | 2000 | 58.1±3.3               | 26.7±1.6    | 34.0±1.3    |

RT: Retention time (minutes). RI: Retention index. Normalised area (x100): (mean± s.d.) calculated as described in the methods section. Oci: unidentified (E/Z)-β -Ocimene products

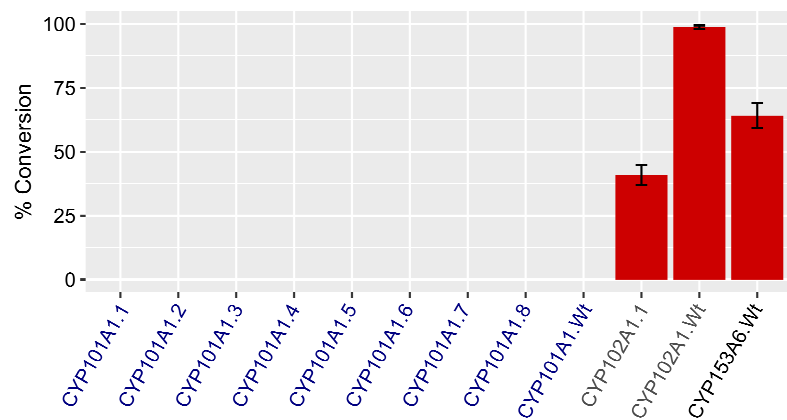

**Supplementary Figure S3. Conversion % of Geraniol (3) by CYPs library.**  
Mean and standard deviation (error bars) shown.

| Name                   | SMILES                             | RT    | RI   | Normalised area (x100) |             |             |
|------------------------|------------------------------------|-------|------|------------------------|-------------|-------------|
|                        |                                    |       |      | CYP102A1.1             | CYP102A1.Wt | CYP153A6.Wt |
| Ger (u8)               |                                    | 12.67 | 2000 | 7.9±0.8                | 125.3±2.0   | 13.0±2.7    |
| Geranic acid (24)      | <chem>CC(=CCCC(=CC(=O)O)C)C</chem> | 13.41 | 2000 | 13.8±0.6               | 20.3±0.2    |             |
| Ger (u7)               |                                    | 13.59 | 2000 | 4.3±0.3                | 150.0±4.2   |             |
| Ger (u6)               |                                    | 14.42 | 2000 | 33.6±0.7               | 13.6±0.2    | 76.4±20.0   |
| 8-hydroxygeraniol (23) | <chem>CC(=CCO)CCC=C(C)CO</chem>    | 14.6  | 2000 | 102.9±4.5              | 13.8±0.3    | 229.6±15.0  |

RT: Retention time (minutes). RI: Retention index. Normalised area (x100): (mean± s.d.) calculated as described in the methods section. Ger: unidentified Geraniol products

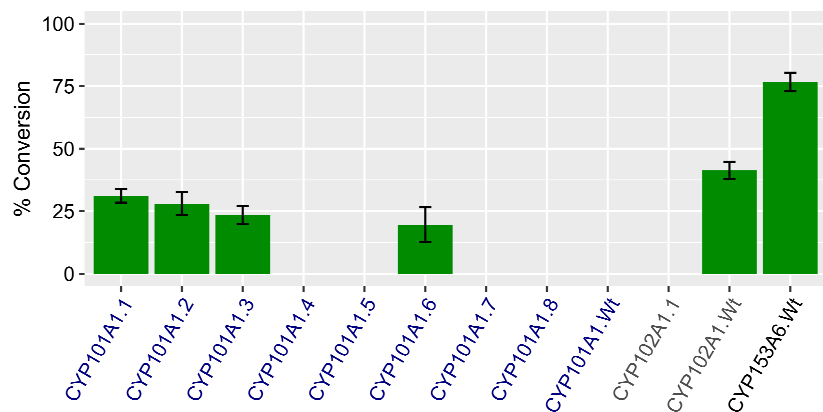

**Supplementary Figure S4. Conversion % of  $\gamma$ -Terpinene (4) by CYPs library.**  
Mean and standard deviation (error bars) shown.

| Supplementary Table S4. Products formed after conversion of $\gamma$ -Terpinene (4) by CYPs library |                                     |       |      |                         |             |             |            |              |              |
|-----------------------------------------------------------------------------------------------------|-------------------------------------|-------|------|-------------------------|-------------|-------------|------------|--------------|--------------|
| Name (number)                                                                                       | SMILES                              | RT    | RI   | Normalised area (x100)* |             |             |            |              |              |
|                                                                                                     |                                     |       |      | CYP101A1.1              | CYP101A1.2  | CYP101A1.3  | CYP101A1.6 | CYP102A1.Wt  | CYP153A6.Wt  |
| <i>p</i> -cymene (-)                                                                                | <chem>CC1=CC=C(C=C1)C(C)C</chem>    | 6.49  | 1368 | 1019.9±35.7             | 1155.8±50.2 | 1039.0±10.4 | 916.8±92.5 | 2055.8±315.4 | 13.1±2.4     |
| <i>p</i> -cymenene (-)                                                                              | <chem>CC1=CC=C(C=C1)C(=C)C</chem>   | 8.96  | 1445 | 96.4±2.2                | 74.0±6.7    | 41.2±1.7    | 21.1±2.2   | 152.5±2.2    |              |
| $\gamma$ -Ter (u9)                                                                                  |                                     | 9.6   | 1508 | 152.3±2.1               | 57.0±2.8    | 36.9±0.5    | 15.9±1.2   | 133.3±3.5    | 4.2±0.1      |
| 4-Isopropylbenzaldehyde (31)                                                                        | <chem>CC(C)C1=CC=C(C=C1)C=O</chem>  | 11.19 | 2309 |                         |             |             |            | 11.8±2.1     | 165.6±6.9    |
| <i>p</i> -Mentha-1,4-dien-7-al (30)                                                                 | <chem>CC(C)C1=CCC(=CC1)C=O</chem>   | 11.28 | 1806 | 20.5±1.0                | 42.6±1.0    | 46.3±1.7    | 14.0±1.8   | 15.7±1.3     | 998.4±41.9   |
| <i>p</i> -Cymen-8-ol (29)                                                                           | <chem>CC1=CC=C(C=C1)C(C)(C)O</chem> | 11.47 | 1888 | 361.7±7.5               | 259.8±27.9  | 123.6±4.6   | 40.2±3.5   | 1101.6±74.7  |              |
| <i>p</i> -Mentha-1,4-dien-7-ol (28)                                                                 | <chem>CC(C)C1=CCC(=CC1)CO</chem>    | 12.37 | 2000 | 11.2±0.4                | 9.6±3.4     |             | 83.1±6.0   | 36.4±3.7     | 2387.0±190.1 |
| <i>p</i> -Cymen-7-ol (27)                                                                           | <chem>CC(C)C1=CC=C(C=C1)CO</chem>   | 12.55 | 2000 | 20.7±2.3                | 61.9±88.0   | 10.8±1.2    | 139.9±13.6 | 197.1±6.6    | 147.6±31.3   |
| Thymol (26)                                                                                         | <chem>CC1=CC(=C(C=C1)C(C)C)O</chem> | 12.83 | 2000 |                         |             |             |            | 89.2±3.3     |              |
| Carvacrol (25)                                                                                      | <chem>CC1=C(C=C(C=C1)C(C)C)O</chem> | 12.95 | 2000 | 15.0±1.6                | 15.9±4.1    | 15.7±0.7    |            | 171.8±6.7    |              |

RT: Retention time (minutes). RI: Retention index. Normalised area (x100): (mean± s.d.) calculated as described in the methods section.  $\gamma$ -Ter: unidentified  $\gamma$ -Terpinene products. \*Normalised areas showing large numbers due to the partial overlapping of substrate and internal standard peaks which affects the peak relative area integration.

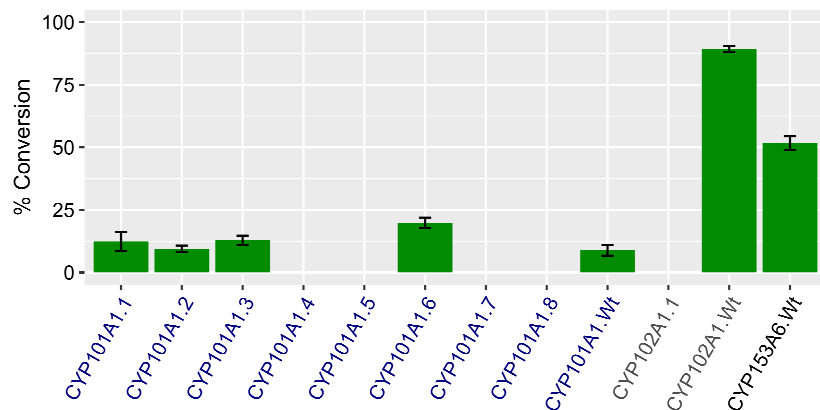

**Supplementary Figure S5. Conversion of  $\alpha$ -Terpineol (5) by CYPs library.**  
Mean and standard deviation (error bars) shown.

| Supplementary Table S5 Products formed after conversion of $\alpha$ -Terpineol (5) by CYPs library |                                    |      |      |                        |            |            |            |             |             |             |
|----------------------------------------------------------------------------------------------------|------------------------------------|------|------|------------------------|------------|------------|------------|-------------|-------------|-------------|
| Product (name)                                                                                     | SMILES                             | RT   | RI   | Normalised area (x100) |            |            |            |             |             |             |
|                                                                                                    |                                    |      |      | CYP101A1.1             | CYP101A1.2 | CYP101A1.3 | CYP101A1.6 | CYP101A1.Wt | CYP102A1.Wt | CYP153A6.Wt |
| $\alpha$ -Terp ( <b>u11</b> )                                                                      |                                    | 12.1 | 2794 | 6.0±0.7                | 2.1±0.1    | 5.1±0.2    | 5.6±0.3    | 3.3±0.1     | 94.2±6.0    | 0.8±0.1     |
| Sobrerol ( <b>33</b> )                                                                             | <chem>CC1=CCC(CC1O)C(C)(C)O</chem> | 13.4 | 2000 |                        |            |            |            |             | 19.2±1.0    |             |
| $\alpha$ -Terp ( <b>u10</b> )                                                                      |                                    | 13.6 | 2000 | 5.6±0.2                | 5.0±0.4    | 6.0±0.3    | 5.5±0.4    | 5.5±1.2     | 37.2±2.0    | 7.9±0.7     |
| 7-hydroxyterpienol ( <b>32</b> )                                                                   | <chem>CC(C)(O)C1CCC(CO)=CC1</chem> | 14.1 | 2000 | 3.6±0.4                | 4.0±0.1    |            | 5.2±0.1    | 4.5±0.3     | 32.5±0.2    | 157.9±6.5   |

RT: Retention time (minutes). RI: Retention index. Normalised area (x100): (mean± s.d.) calculated as described in the methods section.  $\alpha$ -Terp: unidentified  $\alpha$ -Terpineol products.

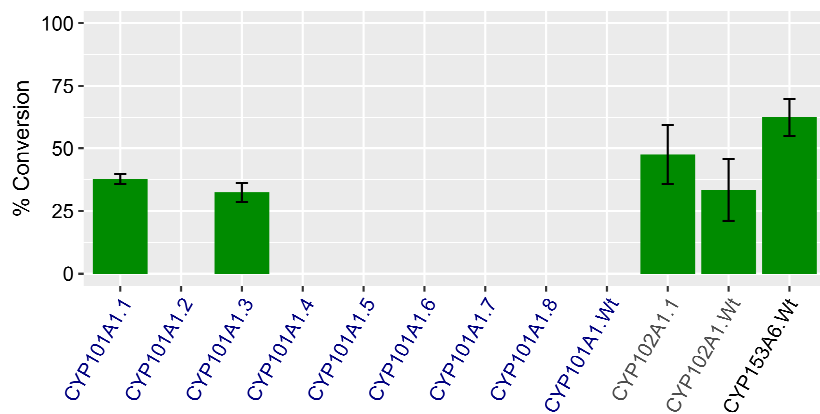

**Supplementary Figure S6. Conversion of Terpinolene (6) by CYPs library.**  
Mean and standard deviation (error bars) shown.

| Supplementary Table S6. Products formed after conversion of Terpinolene (6) by CYPs library |                                  |       |      |                        |            |            |            |             |            |
|---------------------------------------------------------------------------------------------|----------------------------------|-------|------|------------------------|------------|------------|------------|-------------|------------|
| Name                                                                                        | SMILES                           | RT    | RI   | Normalised area (x100) |            |            |            |             |            |
|                                                                                             |                                  |       |      | CYP101A1.1             | CYP101A1.2 | CYP101A1.3 | CYP101A1.6 | CYP102A1.Wt | CY153A6.Wt |
| <i>p</i> -Mentha-1,5,8-triene (-)                                                           | <chem>CC1=CCC(C=C1)C(=C)C</chem> | 8.85  | 1424 | 4.3±0.1                | 6.2±0.5    | 6.4±1.1    | 3.0±1.4    | 1.7±0.3     | 1.4±0.7    |
| Terp ( <b>u14</b> )                                                                         |                                  | 12.28 | 2000 | 17.5±0.2               | 9.0±0.4    | 7.7±0.7    | 26.1±8.9   | 4.5±1.1     | 18.0±0.4   |
| Terp ( <b>u13</b> )                                                                         |                                  | 12.3  | 2000 |                        |            |            |            | 3.5±0.7     | 39.5±0.8   |
| <i>p</i> -Menthadien-7-ol ( <b>34</b> )                                                     | <chem>CC(C)C1=CC=C(CC1)CO</chem> | 12.53 | 2000 |                        |            |            |            |             | 86.1±2.1   |
| Terp ( <b>u12</b> )                                                                         |                                  | 13.47 | 2000 |                        |            |            | 7.1±0.6    | 26.5±5.0    |            |

RT: Retention time (minutes). RI: Retention index. Normalised area (x100): (mean± s.d.) calculated as described in the methods section. Ter: unidentified Terpinolene products.

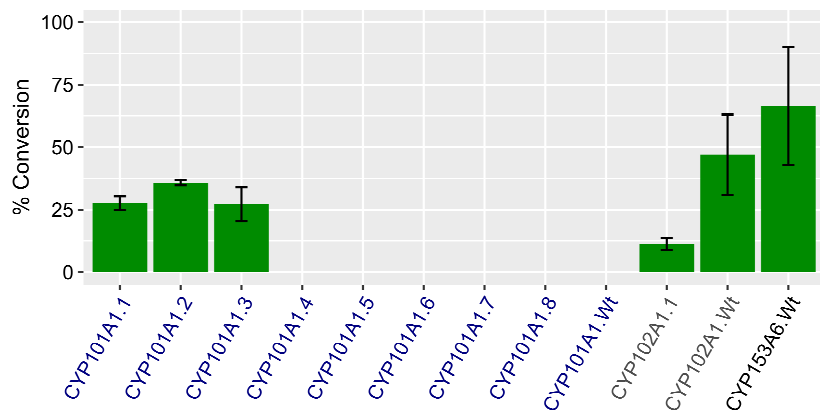

**Supplementary Figure S7. Conversion of (R)-Limonene (7) by CYPs library.**  
Mean and standard deviation (error bars) shown.

| Supplementary Table S7 .Products formed after conversion of (R)-Limonene (7) by CYPs library |                                              |       |      |                        |            |            |            |             |             |
|----------------------------------------------------------------------------------------------|----------------------------------------------|-------|------|------------------------|------------|------------|------------|-------------|-------------|
| Name (Number)                                                                                | SMILES                                       | RT    | RI   | Normalised area (x100) |            |            |            |             |             |
|                                                                                              |                                              |       |      | CYP101A1.1             | CYP101A1.2 | CYP101A1.3 | CYP102A1.1 | CYP102A1.Wt | CYP153A6.Wt |
| (+)- <i>cis</i> -Limonene-1,2-epoxide (42)                                                   | <chem>C=C([C@@H]1CC[C@@]2([H])OC2C1)C</chem> | 9.04  | 1467 | 28.5±0.3               | 30.5±0.8   | 10.4±0.3   | 7.4±0.4    | 25.9±1.9    | 2.2±0.8     |
| (+)- <i>trans</i> -Limonene-1,2-epoxide (41)                                                 | <chem>C=C([C@@H]1CC[C@]2([H])OC2C1)C</chem>  | 9.16  | 1514 | 3.5±0.0                | 3.7±0.1    | 3.4±0.1    | 5.8±0.1    | 10.8±0.7    | 2.6±0.5     |
| D-Dihydrocarvone (-)                                                                         | <chem>CC1CCC(CC1=O)C(=C)C</chem>             | 10.24 | 1603 |                        |            |            |            | 2.0±0.1     | 0.5±0.3     |
| <i>trans</i> -d-hydrocarvone (-)                                                             | <chem>CC1CCC(CC1=O)C(=C)C</chem>             | 10.25 | 1606 | 1.8±0.0                | 2.0±0.1    |            | 8.3±0.3    |             | 0.7±0.2     |
| (+)- <i>cis</i> -Isopiperitenol (40)                                                         | <chem>CC1=C[C@H](O)[C@H](C(C)=C)CC1</chem>   | 11.03 | 1810 |                        |            |            |            | 129.4±5.0   |             |
| (+)- <i>trans</i> -Isopiperitenol (39)                                                       | <chem>CC1=C[C@H](O)[C@H](C(C)=C)CC1</chem>   | 11.05 | 1830 | 48.5±0.6               | 75.1±3.8   | 87.4±10.6  | 4.1±0.2    |             | 2.8±0.2     |
| Perillyl aldehyde (-)                                                                        | <chem>CC([C@H]1CCC(C=O)=CC1)=C</chem>        | 11.22 | 2751 |                        |            |            | 3.2±0.9    |             | 12.4±0.5    |
| (+)- <i>cis</i> -Carveol (38)                                                                | <chem>CC([C@H]1CC=C([C@H](C1)O)C)=C</chem>   | 11.42 | 1854 | 20.1±0.4               | 21.0±0.9   | 8.5±0.6    |            |             | 6.5±0.3     |
| (+)- <i>trans</i> -Carveol (37)                                                              | <chem>CC([C@H]1CC=C([C@H](C1)O)C)=C</chem>   | 11.57 | 2003 |                        |            |            | 11.4±0.2   | 26.5±0.2    |             |
| (+)-Perillyl alcohol (36)                                                                    | <chem>CC([C@H]1CC=C([C@H](C1)O)C)=C</chem>   | 12.18 | 2000 | 2.3±0.1                | 2.8±0.1    | 1.4±0.0    | 87.9±8.0   | 6.5±0.1     | 228.2±31.6  |
| Limonene-1,2-diol (35)                                                                       | <chem>CC([C@H]1CCC(C)(O)C(O)C1)=C</chem>     | 13.18 | 2000 | 10.5±0.3               | 11.4±0.5   | 4.9±0.2    | 14.8±5.2   | 29.6±0.3    | 4.0±0.2     |

RT: Retention time (minutes). RI: Retention index. Normalised area (x100) (mean± s.d.) calculated as described in the methods section.



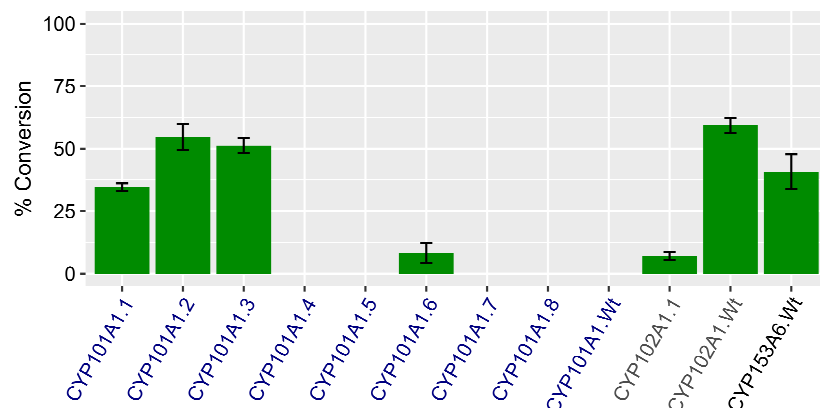

**Supplementary Figure S8. Conversion of (S)-Limonene (8) by CYPs library.**  
Mean and standard deviation (error bars) shown.

| Supplementary Table S8. Products formed after conversion of (S)-Limonene (8) by CYPs library |                                              |       |      |                        |            |            |            |            |             |             |  |
|----------------------------------------------------------------------------------------------|----------------------------------------------|-------|------|------------------------|------------|------------|------------|------------|-------------|-------------|--|
| Name (number)                                                                                | SMILES                                       | RT    | RI   | Normalised area (x100) |            |            |            |            |             |             |  |
|                                                                                              |                                              |       |      | CYP101A1.1             | CYP101A1.2 | CYP101A1.3 | CYP101A1.6 | CYP102A1.1 | CYP102A1.Wt | CYP153A6.Wt |  |
| (-)- <i>cis</i> -Limonene-1,2-epoxide (50)                                                   | <chem>C=C([C@H]1CC[C@]2([H])OC2C1)C</chem>   | 9.04  | 1467 | 4.7±0.6                | 1.7±0.8    | 2.6±1.2    | 1.8±0.0    | 2.1±0.1    | 9.4±0.2     | 0.9±0.0     |  |
| (-)- <i>trans</i> -Limonene-1,2-epoxide (49)                                                 | <chem>C=C([C@H]1CC[C@@]2([H])OC2C1)C</chem>  | 9.16  | 1514 | 3.4±0.1                | 3.3±0.3    | 2.6±0.1    | 0.6±0.0    | 1.3±0.0    | 68.2±0.9    | 0.4±0.0     |  |
| (-)- <i>cis</i> -Isopiperitenol (48)                                                         | <chem>CC1=C[C@@H](O)[C@@H](C(C)=C)CC1</chem> | 11.03 | 1810 |                        |            |            |            |            | 46.6±1.0    |             |  |
| (-)- <i>trans</i> -Isopiperitenol (47)                                                       | <chem>CC1=C[C@H](O)[C@@H](C(C)=C)CC1</chem>  | 11.05 | 1830 | 112.0±3.6              | 156.9±12.7 | 187.3±3.3  | 21.6±0.6   | 2.3±0.2    |             | 1.5±0.2     |  |
| Perillyl aldehyde (-)                                                                        | <chem>CC([C@H]1CCC(C=O)=CC1)=C</chem>        | 11.22 | 2751 |                        |            |            |            | 4.7±0.3    |             | 9.5±2.2     |  |
| (-)- <i>cis</i> -Carveol (46)                                                                | <chem>CC([C@H]1CC=C([C@@H](C1)O)C)=C</chem>  | 11.42 | 1854 | 35.0±1.3               | 53.4±4.2   | 17.5±0.8   | 3.9±0.1    | 6.9±0.1    | 41.3±1.0    | 3.2±0.1     |  |
| $\alpha$ -Limonene diepoxide (45)                                                            | <chem>CC12CCC(CC1O2)C3(CO3)C</chem>          | 11.48 | 1891 | 6.8±0.4                | 9.7±0.5    |            |            |            | 63.2±2.9    |             |  |
| <i>trans</i> -Shisoal (-)                                                                    | <chem>CC(=C)C1CCC(CC1)CO</chem>              | 11.88 | 1966 | 1.5±0.2                |            |            | 1.2±0.1    | 4.0±0.2    |             | 2.5±0.3     |  |
| (-)-Perillyl alcohol (44)                                                                    | <chem>CC([C@H]1CCC(CO)=CC1)=C</chem>         | 12.18 | 2000 | 2.3±0.1                | 2.3±0.1    | 1.0±0.1    | 8.0±0.2    | 58.4±6.5   | 7.6±0.2     | 214.3±20.7  |  |
| Limonene-1,2-diol (43)                                                                       | <chem>CC([C@H]1CCC(C)(O)C(O)C1)=C</chem>     | 13.18 | 2000 | 4.7±0.4                | 4.1±0.3    | 4.0±0.4    | 3.5±0.1    | 8.5±0.5    | 15.4±0.5    | 5.8±4.5     |  |

RT: Retention time (minutes). RI: Retention index. Normalised area (x100): (mean± s.d.) calculated as described in the methods section.

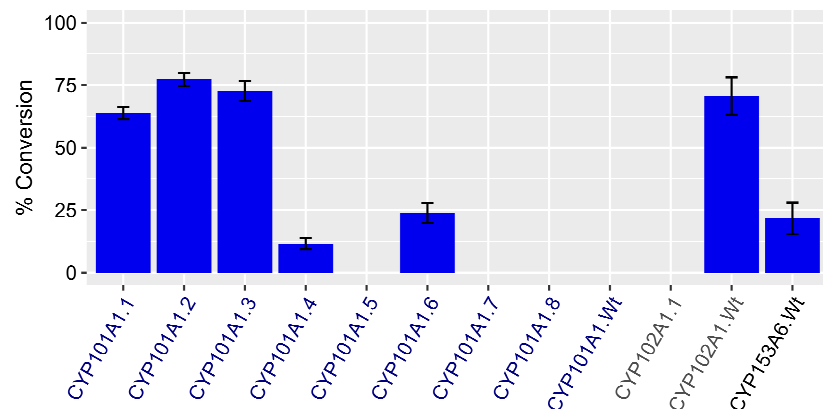

**Supplementary Figure S9. Conversion of (+)-Carene (9) by CYPs library.**

Mean and standard deviation (error bars) shown.

| Supplementary Table S9. Products formed after conversion of (+)-Carene (9) by CYPs library |                                      |       |      |                        |            |            |            |            |             |             |
|--------------------------------------------------------------------------------------------|--------------------------------------|-------|------|------------------------|------------|------------|------------|------------|-------------|-------------|
| Name (Number)                                                                              | SMILES                               | RT    | RI   | Normalised area (x100) |            |            |            |            |             |             |
|                                                                                            |                                      |       |      | CYP101A1.1             | CYP101A1.2 | CYP101A1.3 | CYP101A1.4 | CYP101A1.6 | CYP102A1.Wt | CYP153A6.Wt |
| <i>p</i> -Cymene                                                                           | <chem>CC1=CC=C(C=C1)C(C)C</chem>     | 6.48  | 1368 | 14.4±0.8               | 14.7±1.6   | 15.5±0.3   | 7.7±0.2    | 11.9±0.3   | 1.9±0.4     |             |
| Car (u17)                                                                                  |                                      | 9.06  | 1474 | 93.3±0.3               | 83.8±2.3   | 36.1±0.8   | 6.7±0.1    | 9.5±0.2    | 62.2±4.6    | 10.2±0.4    |
| <i>p</i> -Mentha-1,5-dien-8-ol (55)                                                        | <chem>CC1=CCC(C=C1)C(C)C(O)</chem>   | 10.85 | 1719 | 165.8±1.5              | 184.8±4.5  | 242.0±1.9  | 32.3±0.8   | 149.6±4.2  | 46.6±5.1    | 14.5±0.6    |
| <i>p</i> -Mentha-1,3-dien-8-ol (54)                                                        | <chem>CC1=CC=C(C(C)C(O)C)CC1</chem>  |       |      |                        |            |            |            |            |             |             |
| <i>p</i> -Mentha-1,5-dien-8-ol (55)                                                        | <chem>CC1=CCC(C=C1)C(C)C(O)</chem>   | 10.89 | 1734 | 105.4±3.8              | 134.0±6.7  | 92.1±1.7   | 10.3±0.2   | 23.3±0.9   | 14.7±2.7    |             |
| <i>p</i> -Mentha-1,3-dien-8-ol (54)                                                        | <chem>CC1=CC=C(C(C)C(O)C)CC1</chem>  |       |      |                        |            |            |            |            |             |             |
| Car (u16)                                                                                  |                                      | 11.05 | 1838 | 48.6±3.6               | 69.1±5.5   | 50.3±1.1   | 4.5±0.3    | 8.7±0.4    | 7.4±0.8     | 3.3±0.3     |
| <i>m</i> -Cymen-8-ol (53)                                                                  | <chem>CC1=CC(=CC=C1)C(C)C(O)</chem>  | 11.44 | 1869 | 10.3±0.7               | 12.8±1.1   | 29.8±0.4   | 1.2±0.1    | 4.8±0.6    | 8.9±0.9     |             |
| Car-3-en-5-one (52)                                                                        | <chem>CC1=CC(=O)C2C(C1)C2(C)C</chem> | 11.87 | 1961 | 9.2±0.5                | 8.8±0.7    | 8.8±0.1    | 3.4±0.0    | 10.8±0.5   | 5.1±0.3     |             |
| Car (u15)                                                                                  |                                      | 11.91 | 1989 |                        |            |            |            |            |             | 174.6±3.8   |
| 3-Caren-10-ol (51)                                                                         | <chem>OCC(CC12)=CCC2C1(C)C</chem>    | 11.95 | 2026 | 7.5±1.6                | 13.0±1.0   | 9.2±0.7    | 1.8±0.1    | 5.3±0.7    | 4.0±0.9     | 50.7±0.6    |
| <i>p</i> -Cymen-7-ol (-)                                                                   | <chem>CC(C)C1=CC=C(C=C1)CO</chem>    | 12.5  | 2000 |                        |            |            |            |            | 1.2±0.1     | 6.3±0.6     |

RT: Retention time (minutes), RI: Retention index. Normalised area (x100): relative peak area (mean± s.d.) calculated as described in the methods section. Car: unidentified (+)-Carene products.

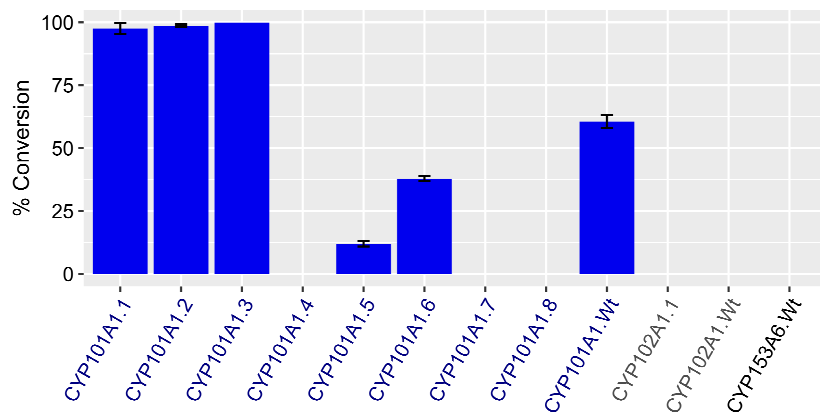

**Supplementary Figure S10. Conversion of 1,8-Cineole (10) by CYPs library.**  
Mean and standard deviation (error bars) shown.

| Name (number)                  | SMILES                                           | RT   | RI   | Normalised area (x100) |            |            |            |            |             |
|--------------------------------|--------------------------------------------------|------|------|------------------------|------------|------------|------------|------------|-------------|
|                                |                                                  |      |      | CYP101A1.1             | CYP101A1.2 | CYP101A1.3 | CYP101A1.5 | CYP101A1.6 | CYP101A1.Wt |
| Cin (u19)                      |                                                  | 10.5 | 1693 | 25.1±13.6              | 16.0±1.0   | 53.4±2.4   | 1.3±0.1    | 2.9±0.1    | 6.9±0.6     |
| 2-Hydroxycineole (57)          | <chem>CC1(C2CCC(O1)(C(C2)O)C)C</chem>            | 11.5 | 1983 | 50.6±5.9               | 33.9±1.8   | 7.9±0.4    | 2.6±0.1    | 20.1±0.4   | 67.8±3.5    |
| 3-exo-Hydroxy-1,8-cineole (56) | <chem>CC1(C)[C@@H]2CC[C@@](C[C@H]2O)(C)O1</chem> | 11.8 | 1920 | 275.6±32.4             | 300.3±11.5 | 288.2±9.6  | 63.5±3.4   | 142.3±0.5  | 171.1±8.6   |
| Cin (u18)                      |                                                  | 11.9 | 1973 | 62.7±8.3               | 81.3±3.1   | 69.6±3.4   | 7.1±0.4    | 22.4±1.2   | 48.7±1.8    |

RT: Retention time (minutes). RI: Retention index. Normalised area (x100): (mean± s.d.) calculated as described in the methods section. Cin: unidentified 1,8-Cineole products.

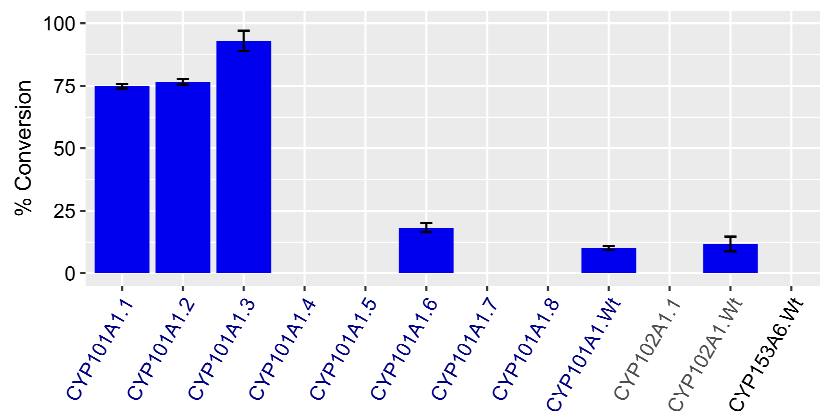

**Supplementary Figure S11. Conversion of (+)-Fenchol (11) by CYPs library.**

Mean and standard deviation (error bars) shown.

| Supplementary Table S11 Products formed after conversion of (+)-Fenchol (11) by CYPs library |                                     |       |      |                        |             |            |            |             |             |
|----------------------------------------------------------------------------------------------|-------------------------------------|-------|------|------------------------|-------------|------------|------------|-------------|-------------|
| Name (Number)                                                                                | SMILES                              | RT    | RI   | Normalised area (x100) |             |            |            |             |             |
|                                                                                              |                                     |       |      | CYP101A1.1             | CYP101A1.2  | CYP101A1.3 | CYP101A1.6 | CYP101A1.Wt | CYP102A1.Wt |
| Fenchone (-)                                                                                 | <chem>CC1(C2CCC(C2)(C1=O)C)C</chem> | 8.54  | 2094 | 3.9±0.1                | 2.5±0.1     | 1.3±0.4    | 3.9±0.1    | 1.6±0.1     | 7.8±0.3     |
| Fen (u21)                                                                                    |                                     | 12.78 | 2000 | 53.4±12.1              | 54.3±21.9   | 59.0±6.4   | 9.9±1.4    | 11.0±5.3    | 1.6±0.1     |
| Fen (u20)                                                                                    |                                     | 13.28 | 2000 | 378.8±21.3             | 443.3±108.4 | 409.2±30.0 | 108.0±5.7  | 81.0±15.6   | 46.2±2.4    |

RT: Retention time (minutes). RI: Retention index. Amount: relative peak area (mean± s.d.) calculated as described in the methods section. Fen: unidentified (+)-Fenchol products.

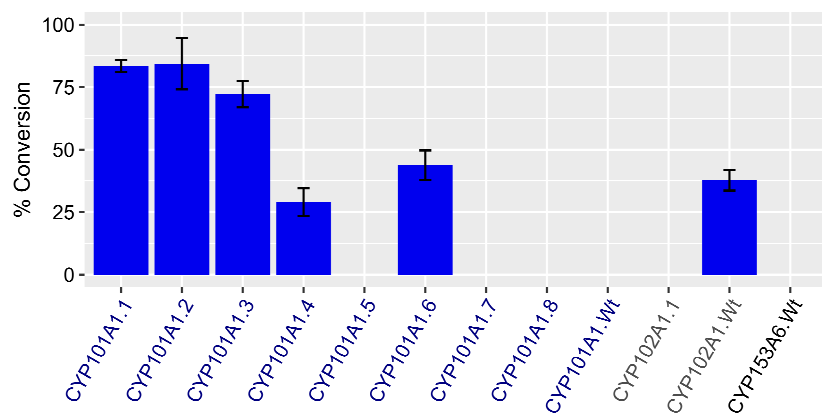

**Supplementary Figure S12. Conversion of (-)- $\beta$ -Pinene (12) by CYPs library.**

Mean and standard deviation (error bars) shown.

| Name (number)                       | SMILES                                           | RT   | RI   | Normalised area (x100) |            |            |            |            |             |
|-------------------------------------|--------------------------------------------------|------|------|------------------------|------------|------------|------------|------------|-------------|
|                                     |                                                  |      |      | CYP101A1.1             | CYP101A1.2 | CYP101A1.3 | CYP101A1.4 | CYP101A1.6 | CYP102A1.Wt |
| (-)- <i>trans</i> -Pinocarveol (60) | <chem>CC1(C)[C@@H]2C[C@H]1C([C@H](O)C2)=C</chem> | 10.5 | 1634 |                        |            |            | 12.3±1.0   | 13.6±0.4   | 56.6±4.5    |
| (-)-Myrtenol (59)                   | <chem>CC1([C@H]2C[C@H]1C(CO)=CC2)C</chem>        | 11.2 | 4462 | 9.4±2.0                | 7.4±1.4    | 1.7±0.2    |            | 6.2±0.4    |             |
| (-)- <i>cis</i> -Myrtanol (-)       | <chem>CC1(C)[C@H]2CC[C@@H](CO)[C@H]1C2</chem>    | 11.6 | 1934 | 4.9±0.9                |            |            | 2.7±0.4    | 3.0±0.2    | 4.3±0.3     |
| Perillyl alcohol (58)               | <chem>CC(=C)C1CCC(=CC1)CO</chem>                 | 12.2 | 1905 | 22.0±1.5               | 17.2±2.4   | 8.3±1.7    | 9.5±0.1    | 9.7±0.4    | 3.2±0.5     |
| <i>p</i> -menthadien-7-ol (34)      | <chem>CC@C1=CC=C(CC1)CO</chem>                   | 12.5 | 1976 | 36.8±2.0               | 28.4±4.4   | 21.8±3.4   | 14.6±0.1   | 14.5±0.6   | 5.4±0.7     |
| 7-Hydroxy-terpineol (32)            | <chem>CC(C1CCC(CO)=CC1)(O)C</chem>               | 14.1 | 2000 | 212.4±19.3             | 160.9±25.4 | 126.3±15.5 | 97.4±2.6   | 88.6±3.9   | 148.5±14.5  |

RT: Retention time (minutes). RI: Retention index. Normalised area (x100): (mean± s.d.) calculated as described in the methods section.

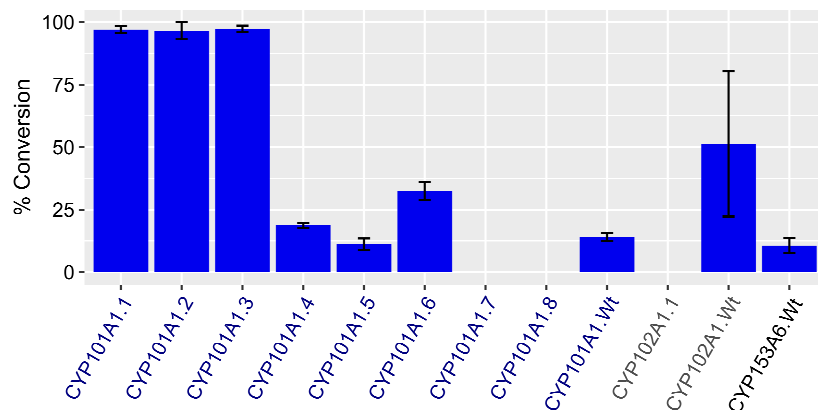

**Supplementary Figure S13. Conversion of (+)- $\beta$ -Pinene (13) by CYPs library.**  
Mean and standard deviation (error bars) shown.

**Supplementary Table S13. Products formed after conversion of (+)- $\beta$ -Pinene (13) by CYPs library**

| Name (number)                       | SMILES                                           | RT   | RI   | Normalised area (x100) |            |            |            |            |            |             |             |             |
|-------------------------------------|--------------------------------------------------|------|------|------------------------|------------|------------|------------|------------|------------|-------------|-------------|-------------|
|                                     |                                                  |      |      | CYP101A1.1             | CYP101A1.2 | CYP101A1.3 | CYP101A1.4 | CYP101A1.5 | CYP101A1.6 | CYP101A1.Wt | CYP102A1.Wt | CYP153A6.Wt |
| (+)- <i>trans</i> -Pinocarveol (62) | <chem>CC1(C)[C@H]2C[C@@H]1C([C@H](O)C2)=C</chem> | 10.5 | 1739 | 6.5±1.5                | 2.8±0.7    |            | 18.4±0.4   | 8.4±0.1    | 22.4±0.3   | 1.5±0.1     | 4.9±2.2     | 42.2±0.5    |
| (+)-Myrtenol (61)                   | <chem>CC1([C@H]2C[C@@H]1C(CO)=CC2)C</chem>       | 11.2 | 4869 | 10.8±0.7               | 6.6±0.6    | 1.0±0.3    | 4.4±0.1    | 2.9±0.1    | 4.8±0.1    | 2.2±0.1     | 2.0±0.6     | 5.2±0.2     |
| (+)- <i>cis</i> -Myrtenol (-)       | <chem>CC1(C)[C@H]2CC[C@@H](CO)[C@H]1C2</chem>    | 11.6 | 2046 | 4.6±0.7                | 2.3±0.2    |            | 2.4±0.1    | 2.0±0.1    | 1.8±0.1    | 2.8±0.2     | 2.1±0.7     | 1.0±0.1     |
| Perillyl alcohol (58)               | <chem>CC(=C)C1CCC(CO)=CC1</chem>                 | 12.2 | 2000 | 21.3±0.3               | 22.1±0.5   | 12.3±0.2   | 3.4±0.1    | 2.4±0.1    | 4.3±0.1    | 3.1±0.1     |             |             |
| <i>p</i> -Menthadien-7-ol (34)      | <chem>CC(C)C1=CC=C(CC1)CO</chem>                 | 12.5 | 2000 | 38.1±0.7               | 39.4±1.0   | 26.7±0.6   | 5.6±0.0    | 3.8±0.2    | 7.4±0.1    | 5.1±0.0     | 2.6±0.7     |             |
| 7-Hydroxy-terpineol (32)            | <chem>CC(C)CCC(CO)=CC1(O)C</chem>                | 14.1 | 2000 | 215.1±0.1              | 229.2±4.7  | 152.7±3.9  | 34.9±1.8   | 25.4±0.8   | 45.7±1.3   | 30.2±1.0    | 57.0±30.3   | 6.2±0.5     |

RT: Retention time (minutes). RI: Retention index. Normalised area (x100): (mean± s.d.) calculated as described in the methods section.

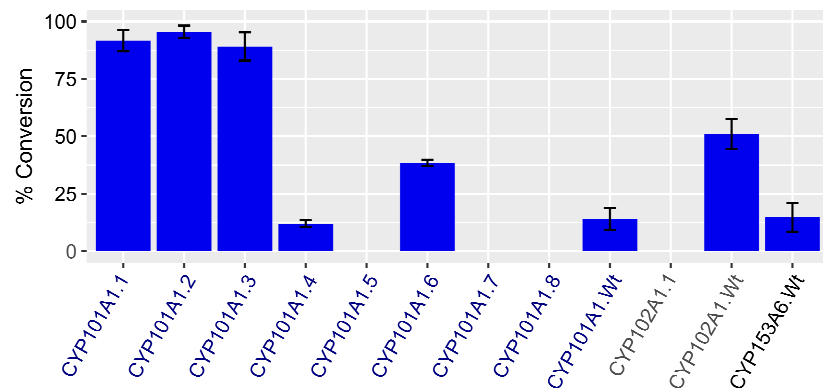

**Supplementary Figure S14. Conversion of (-)- $\alpha$ -Pinene (14) by CYPs.**

Mean and standard deviation (error bars) shown.

| Supplementary Table S14. Products formed after conversion of (-)- $\alpha$ -Pinene (14) by CYPs library |                                                 |       |      |                        |            |            |            |            |             |             |             |  |
|---------------------------------------------------------------------------------------------------------|-------------------------------------------------|-------|------|------------------------|------------|------------|------------|------------|-------------|-------------|-------------|--|
| Name (number)                                                                                           | SMILES                                          | RT    | RI   | Normalised area (x100) |            |            |            |            |             |             |             |  |
|                                                                                                         |                                                 |       |      | CYP101A1.1             | CYP101A1.2 | CYP101A1.3 | CYP101A1.4 | CYP101A1.6 | CYP101A1.Wt | CYP102A1.Wt | CYP153A6.Wt |  |
| (-)- <i>cis</i> -verbenol (65)                                                                          | <chem>CC1=C[C@H](O)[C@H]2C[C@@H]1C2(C)C</chem>  | 10.53 | 1735 | 59.3±11.9              | 42.6±4.5   | 27.9±4.5   | 43.9±1.7   | 27.3±1.0   | 7.4±0.3     | 8.2±0.3     | 2.9±0.0     |  |
| (-)- <i>trans</i> -verbenol (64)                                                                        | <chem>CC1=C[C@@H](O)[C@H]2C[C@@H]1C2(C)C</chem> | 10.66 | 2007 | 52.4±7.3               | 44.6±2.7   | 38.4±4.0   | 53.8±1.6   | 52.2±3.1   | 13.3±0.4    | 47.9±1.2    | 15.4±0.3    |  |
| (-)-Verbenone (63)                                                                                      | <chem>CC1=CC([C@H]2C[C@@H]1C2(C)=O)</chem>      | 10.83 | 1713 | 39.8±0.7               | 55.5±1.3   | 100.5±5.2  | 22.3±1.1   | 36.8±2.3   | 2.3±0.2     | 5.2±0.2     | 2.5±0.0     |  |
| (-)-Myrtenol (59)                                                                                       | <chem>CC1([C@@H]2C[C@H]1C(CO)=CC2)C</chem>      | 11.24 | 4661 | 17.8±2.0               | 10.1±0.9   | 15.6±0.3   | 14.6±0.4   | 9.8±0.2    | 8.6±0.4     | 5.6±0.1     | 21.0±0.3    |  |
| (-)- $\alpha$ -Pin (u25)                                                                                |                                                 | 11.69 | 3889 | 33.4±0.4               | 32.7±0.6   | 12.4±0.6   | 1.8±0.1    | 3.2±0.8    | 1.9±0.6     | 9.0±0.4     |             |  |
| Camphostene (-)                                                                                         | <chem>CC1(C2CC1C(C(=O)C2)(C)O)C</chem>          | 12    | 2111 | 17.9±0.5               | 8.7±0.2    | 4.6±0.2    |            | 4.2±2.2    |             |             |             |  |
| (-)- $\alpha$ -Pin (u24)                                                                                |                                                 | 12.15 | 2000 | 15.9±1.1               | 11.6±0.6   | 43.4±1.1   | 7.5±0.3    | 12.1±1.6   | 26.5±0.9    | 4.3±0.2     |             |  |
| Sobrerol (33)                                                                                           |                                                 | 13.35 | 2000 | 45.6±6.4               | 50.1±4.2   | 33.1±4.6   | 14.6±0.4   | 26.3±7.8   | 17.5±2.7    | 186.8±14.5  | 46.0±0.5    |  |
| (-)- $\alpha$ -Pin (u23)                                                                                |                                                 | 14.21 | 2000 | 26.8±18.0              | 15.6±1.7   | 25.1±9.7   |            | 34.9±28.0  | 20.7±12.4   |             |             |  |
| (-)- $\alpha$ -Pin (u22)                                                                                |                                                 | 15    | 2000 | 34.1±9.3               | 28.6±1.0   | 37.0±10.4  | 16.6±1.0   | 49.8±20.9  | 16.2±6.8    |             |             |  |

RT: Retention time (minutes). RI: Retention index. Normalised area (x100): (mean± s.d.) calculated as described in the methods section. (-)- $\alpha$ -Pin: unidentified (-)- $\alpha$ -Pinene products.

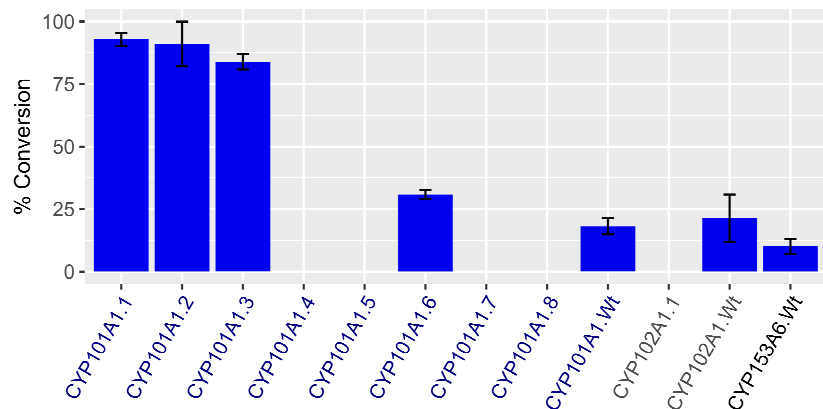

**Supplementary Figure S15. Conversion of (+)- $\alpha$ -Pinene (15) by CYPs library.**  
Mean and standard deviation (error bars) shown.

| Name (Number)                             | SMILES                                          | RT   | RI   | Normalised area (x100) |            |            |            |             |             |             |
|-------------------------------------------|-------------------------------------------------|------|------|------------------------|------------|------------|------------|-------------|-------------|-------------|
|                                           |                                                 |      |      | CYP101A1.1             | CYP101A1.2 | CYP101A1.3 | CYP101A1.6 | CYP101A1.Wt | CYP102A1.Wt | CYP153A6.Wt |
| (+)-Myrtenal (-)                          | <chem>CC1([C@H]2C[C@@H]1C(C=O)=CC2)C</chem>     | 10.4 | 1640 | 1.9±0.4                | 1.9±0.3    | 0.5±0.0    |            | 0.6±0.0     |             |             |
| (+)- <i>cis</i> -Verbenol ( <b>68</b> )   | <chem>CC1=C[C@@H](O)[C@@H]2C[C@H]1C2(C)C</chem> | 10.6 | 1758 | 34.0±0.3               | 46.8±7.7   | 21.1±1.6   | 24.0±0.7   | 12.2±0.7    | 7.5±2.0     | 1.5±0.1     |
| (+)- <i>trans</i> -verbenol ( <b>67</b> ) | <chem>CC1=C[C@H](O)[C@@H]2C[C@H]1C2(C)C</chem>  | 10.7 | 2091 | 194.3±6.5              | 130.4±24.9 | 77.5±6.5   | 47.2±1.9   | 12.7±1.2    | 15.6±2.7    | 6.5±0.3     |
| (+)-Verbenone ( <b>66</b> )               | <chem>CC1=CC([C@@H]2C[C@H]1C2(C)C)=O</chem>     | 10.8 | 1715 | 32.5±1.4               | 90.6±5.2   | 145.9±3.1  | 23.3±1.6   | 2.4±0.3     | 1.8±0.0     | 1.1±0.2     |
| (+)-Myrtenol ( <b>61</b> )                | <chem>CC1([C@H]2C[C@@H]1C(CO)=CC2)C</chem>      | 11.3 | 1802 | 68.4±6.3               | 49.0±8.2   | 9.0±0.6    | 7.3±0.2    | 10.7±0.3    | 6.5±1.1     | 9.5±0.1     |
| Sobrerol ( <b>33</b> )                    | <chem>CC1=CCC(CC1O)C(C)C(O)</chem>              | 13.4 | 2000 | 30.9±13.6              | 17.4±3.3   | 8.7±0.5    | 9.6±1.0    | 7.6±1.3     | 15.5±4.0    | 20.4±1.4    |
| (+)- $\alpha$ -Pin ( <b>u27</b> )         |                                                 | 13.5 | 2000 | 27.6±26.4              | 12.7±1.9   | 9.3±1.3    |            | 6.7±1.4     |             |             |
| (+)- $\alpha$ -Pin ( <b>u26</b> )         |                                                 | 15   | 2000 | 31.0±23.9              | 27.1±2.8   | 40.7±0.8   | 13.2±1.0   | 8.7±2.0     |             |             |

RT: Retention time (minutes). RI: Retention index. Normalised area (x100): (mean± s.d.) calculated as described in the methods section. (+)- $\alpha$ -Pin: unidentified (+)- $\alpha$ -Pinene products.



**Supplementary Table S16. Mass Spectra of non-identified products**

| Substrate used              | Product Number | Product Retention Time (min) | EI-MS, m/z (relative intensity)                                                                                                                                                                                                                                                                    |
|-----------------------------|----------------|------------------------------|----------------------------------------------------------------------------------------------------------------------------------------------------------------------------------------------------------------------------------------------------------------------------------------------------|
| (E/Z)- $\beta$ -Ocimene (2) | u1             | 12.12                        | 121 (21), 119 (30), 117 (5), 106 (8), 105 (25), 103 (6), 97 (6), 95 (14), 94 (79), 93 (98), 92 (60), 91 (68), 84 (21), 83 (6), 81 (18), 80 (23), 79 (100), 78 (10), 77 (49), 71 (6), 69 (8), 68 (7), 67 (28), 66 (6), 65 (13), 55 (25), 53 (22), 51 (9).                                           |
|                             | u2             | 12.26                        | 134 (8), 121 (30), 119 (32), 117 (5), 109 (6), 106 (7), 105 (23), 103 (6), 97 (14), 96 (7), 95 (12), 94 (41), 93 (84), 92 (28), 91 (61), 84 (11), 83 (6), 82 (6), 81 (25), 80 (53), 79 (100), 78 (9), 77 (47), 71 (7), 69 (8), 68 (9), 67 (29), 66 (6), 65 (13), 57 (5), 55 (27), 53 (21), 51 (8). |
|                             | u3             | 12.89                        | 153 (7), 128 (6), 127 (10), 115 (6), 111 (6), 110 (47), 109 (14), 99 (8), 98 (11), 97 (23), 95 (9), 85 (14), 84 (100), 83 (58), 82 (26), 81 (55), 79 (11), 73 (6), 72 (25), 71 (94), 70 (28), 69 (37), 68 (5), 67 (11), 59 (86), 57 (15), 56 (14), 55 (96), 54 (5), 53 (11).                       |
|                             | u4             | 13.43                        | 137 (8), 119 (7), 109 (23), 107 (7), 101 (19), 97 (8), 95 (11), 94 (11), 93 (15), 91 (15), 84 (6), 83 (36), 82 (12), 81 (100), 80 (10), 79 (72), 77 (17), 73 (7), 72 (70), 71 (19), 70 (34), 69 (24), 68 (6), 67 (16), 65 (7), 59 (75), 57 (29), 55 (31), 53 (16), 51 (5).                         |
|                             | u5             | 13.81                        | 101 (24), 84 (8), 83 (61), 73 (6), 71 (13), 70 (100), 69 (22), 67 (5), 59 (8), 57 (6), 56 (6), 55 (98), 53 (11).                                                                                                                                                                                   |
| Geraniol (3)                | u6             | 12.67                        | 111 (5), 110 (6), 109 (25), 98 (5), 97 (29), 95 (10), 94 (11), 93 (8), 91 (5), 87 (11), 86 (9), 85 (90), 84 (45), 83 (28), 82 (22), 81 (100), 80 (7), 79 (44), 77 (9), 72 (25), 71 (66), 70 (12), 69 (32), 68 (13), 67 (33), 65 (6), 59 (97), 57 (37), 56 (10), 55 (27), 53 (17).                  |
|                             | u7             | 13.59                        | 86 (6), 85 (100), 83 (41), 69 (6), 68 (46), 67 (25), 57 (6), 55 (9), 53 (5).                                                                                                                                                                                                                       |
|                             | u8             | 14.42                        | 137 (11), 135 (16), 121 (13), 119 (5), 111 (7), 109 (9), 108 (6), 107 (10), 97 (8), 95 (12), 94 (23), 93 (14), 91 (10), 85 (19), 84 (100), 83 (58), 82 (12), 81 (16), 80 (11), 79 (14), 77 (8), 71 (10), 69 (12), 68 (18), 67 (25), 65 (7), 57 (19), 56 (16), 55 (26), 53 (17), 51 (5).            |
| $\gamma$ -Terpinene (4)     | u9             | 9.60                         | 152 (26), 137 (46), 134 (11), 123 (15), 121 (5), 119 (40), 110 (12), 109 (100), 108 (6), 107 (12), 105 (7), 95 (27), 94 (10), 93 (28), 92 (6), 91 (34), 82 (9), 81 (50), 80 (5), 79 (35), 78 (5), 77 (27), 71 (5), 69 (10), 68 (7), 67 (69), 66 (5), 65 (12), 55 (23), 53 (14), 51 (7).            |
| $\gamma$ -Terpineol (5)     | u10            | 12.09                        | 137 (18), 126 (9), 112 (21), 111 (17), 109 (32), 108 (31), 97 (23), 95 (13), 94 (11), 93 (25), 91 (5), 84 (11), 83 (21), 82 (5), 81 (11), 79 (16), 77 (5), 72 (6), 71 (100), 70 (9), 69 (20), 68 (11), 67 (14), 59 (68), 58 (13), 57 (5), 55 (16), 53 (6).                                         |
|                             | u11            | 13.57                        | 152 (15), 137 (41), 119 (11), 110 (11), 109 (97), 108 (8), 97 (7), 96 (5), 95 (30), 94 (81), 93 (39), 91 (18), 84 (9), 83 (9), 82 (5), 81 (15), 80 (9), 79 (100), 77 (17), 71 (6), 70 (7), 69 (20), 67 (10), 65 (5), 59 (81), 55 (17), 53 (8).                                                     |
| Terpinolene (6)             | u12            | 12.28                        | 152 (31), 134 (28), 123 (6), 122 (10), 121 (100), 119 (36), 117 (6), 115 (5), 109 (8), 106 (8), 105 (29), 103 (6), 95 (17), 94 (32), 93 (55), 92 (17), 91 (57), 84 (9), 81 (12), 80 (6), 79 (57), 78 (8), 77 (33), 67 (14), 65 (10), 57 (5), 55 (13), 53 (11), 51 (7).                             |
|                             | u13            | 12.30                        | 152 (8), 135 (12), 134 (100), 122 (6), 121 (54), 120 (6), 119                                                                                                                                                                                                                                      |

|                                                |            |       |                                                                                                                                                                                                                                                                                                                                                                                                            |
|------------------------------------------------|------------|-------|------------------------------------------------------------------------------------------------------------------------------------------------------------------------------------------------------------------------------------------------------------------------------------------------------------------------------------------------------------------------------------------------------------|
|                                                |            |       | (59), 117 (7), 110 (6), 109 (7), 106 (9), 105 (31), 103 (6), 95 (17), 94 (18), 93 (47), 92 (17), 91 (59), 84 (7), 81 (11), 80 (5), 79 (53), 78 (8), 77 (32), 67 (14), 65 (10), 55 (12), 53 (11), 51 (7).                                                                                                                                                                                                   |
|                                                | <b>u14</b> | 13.50 | 150 (11), 135 (20), 132 (13), 122 (15), 121 (100), 119 (9), 117 (12), 115 (5), 109 (18), 108 (13), 107 (44), 106 (7), 105 (19), 95 (27), 94 (9), 93 (46), 92 (14), 91 (42), 89 (6), 83 (7), 82 (6), 81 (16), 80 (7), 79 (50), 77 (21), 73 (6), 71 (8), 69 (12), 67 (23), 65 (9), 59 (5), 58 (12), 57 (11), 55 (22), 53 (14), 51 (6).                                                                       |
| <b>(+)-Car-3-ene<br/>(9)</b>                   | <b>u15</b> | 9.06  | 138 (7), 137 (66), 123 (24), 121 (6), 119 (25), 110 (14), 109 (100), 108 (8), 107 (10), 105 (8), 96 (6), 95 (39), 94 (22), 93 (28), 92 (5), 91 (28), 83 (13), 82 (20), 81 (55), 80 (7), 79 (39), 77 (22), 71 (5), 69 (17), 68 (20), 67 (85), 65 (11), 55 (29), 54 (5), 53 (18), 51 (6).                                                                                                                    |
|                                                | <b>u16</b> | 11.05 | 119 (50), 117 (8), 115 (6), 110 (10), 109 (100), 108 (12), 107 (24), 106 (5), 105 (16), 103 (6), 97 (13), 96 (40), 95 (56), 94 (60), 93 (27), 92 (15), 91 (72), 84 (36), 83 (26), 82 (70), 81 (53), 80 (20), 79 (43), 78 (9), 77 (39), 70 (9), 69 (45), 68 (10), 67 (64), 66 (7), 65 (19), 59 (21), 57 (6), 56 (7), 55 (34), 54 (7), 53 (21), 51 (11).                                                     |
|                                                | <b>u17</b> | 11.91 | 134 (41), 121 (34), 120 (6), 119 (50), 117 (6), 109 (19), 108 (53), 107 (11), 106 (17), 105 (34), 103 (6), 97 (8), 95 (13), 94 (33), 93 (92), 92 (39), 91 (82), 84 (20), 83 (9), 82 (6), 81 (15), 80 (19), 79 (100), 78 (12), 77 (58), 69 (7), 67 (19), 65 (14), 57 (6), 55 (16), 53 (13), 51 (9).                                                                                                         |
| <b>1,8-Cineole<br/>(10)</b>                    | <b>u18</b> | 10.50 | 153 (100), 82 (89), 111 (85), 83 (83), 55 (59), 125 (43), 67 (38), 69 (21), 110 (20), 109 (17), 71 (14), 168 (14), 85 (13), 112 (13), 108 (13), 95 (13), 84 (12), 93 (12), 97 (11), 154 (10), 107 (10), 68 (10), 53 (9), 77 (8), 140 (7), 105 (7), 81 (6), 58 (6), 79 (5), 56 (5), 126 (5).                                                                                                                |
|                                                | <b>u19</b> | 11.90 | 156 (10), 155 (100), 141 (6), 137 (27), 127 (31), 126 (6), 115 (9), 112 (8), 111 (22), 109 (23), 108 (39), 100 (9), 97 (9), 95 (11), 94 (16), 93 (87), 91 (6), 87 (30), 85 (53), 84 (25), 83 (20), 82 (10), 81 (10), 79 (14), 77 (7), 71 (29), 69 (40), 68 (10), 67 (14), 59 (40), 58 (29), 57 (31), 56 (24), 55 (22), 53 (9).                                                                             |
| <b>(+)-Fenchol<br/>(11)</b>                    | <b>u20</b> | 12.78 | 168 (11), 150 (5), 122 (5), 121 (19), 97 (20), 96 (11), 86 (6), 85 (100), 81 (7), 79 (6), 69 (5), 67 (5), 55 (7).                                                                                                                                                                                                                                                                                          |
|                                                | <b>u21</b> | 13.28 | 155 (25), 152 (20), 137 (29), 127 (5), 126 (20), 123 (18), 122 (9), 121 (76), 119 (7), 111 (40), 110 (10), 109 (45), 108 (23), 107 (7), 100 (9), 99 (14), 98 (11), 97 (48), 96 (20), 95 (24), 94 (8), 93 (24), 91 (12), 85 (41), 84 (10), 83 (31), 82 (21), 81 (100), 80 (83), 79 (27), 77 (13), 73 (9), 72 (49), 71 (33), 70 (12), 69 (35), 68 (14), 67 (26), 65 (7), 57 (31), 56 (22), 55 (38), 53 (16). |
| <b>(-)-<math>\alpha</math>-Pinene<br/>(14)</b> | <b>u22</b> | 11.70 | 168 (29), 153 (7), 138 (5), 137 (50), 135 (5), 125 (5), 110 (9), 109 (100), 108 (5), 107 (11), 95 (15), 94 (6), 93 (10), 91 (16), 85 (7), 81 (18), 79 (17), 77 (15), 69 (6), 67 (47), 65 (7), 55 (17), 53 (7).                                                                                                                                                                                             |
|                                                | <b>u23</b> | 12.15 | 150 (6), 135 (8), 127 (8), 111 (5), 110 (16), 109 (46), 108 (8), 107 (33), 105 (5), 99 (5), 98 (32), 97 (100), 96 (27), 95 (15), 93 (14), 92 (10), 91 (17), 85 (5), 84 (5), 83 (49), 82 (6), 81 (36), 80 (77), 79 (40), 77 (12), 71 (27), 70 (13), 69 (26), 68 (5), 67 (14), 65 (6), 57 (5), 55 (24), 53 (13), 51 (5).                                                                                     |
|                                                | <b>u24</b> | 14.20 | 221 (7), 208 (9), 163 (5), 151 (6), 150 (8), 147 (6), 141 (5),                                                                                                                                                                                                                                                                                                                                             |

|                                                |            |       |                                                                                                                                                                                                                                                                                                                                                                                                                                                                                                                                                                                                                          |
|------------------------------------------------|------------|-------|--------------------------------------------------------------------------------------------------------------------------------------------------------------------------------------------------------------------------------------------------------------------------------------------------------------------------------------------------------------------------------------------------------------------------------------------------------------------------------------------------------------------------------------------------------------------------------------------------------------------------|
|                                                |            |       | 139 (8), 138 (7), 137 (31), 135 (51), 134 (9), 133 (5), 132 (6), 131 (11), 125 (11), 124 (7), 123 (6), 122 (12), 121 (47), 120 (9), 119 (19), 117 (20), 116 (5), 115 (12), 114 (6), 112 (8), 111 (7), 110 (9), 109 (15), 108 (18), 107 (83), 106 (12), 105 (27), 100 (7), 97 (15), 96 (19), 95 (100), 94 (16), 93 (35), 92 (41), 91 (61), 89 (12), 88 (6), 87 (16), 86 (5), 85 (21), 84 (5), 83 (18), 82 (20), 81 (23), 80 (18), 79 (77), 78 (13), 77 (44), 73 (11), 72 (19), 71 (10), 70 (9), 69 (52), 68 (11), 67 (28), 66 (14), 65 (23), 63 (8), 59 (30), 57 (21), 56 (6), 55 (47), 54 (5), 53 (23), 52 (7), 51 (11). |
|                                                | <b>u25</b> | 15.00 | 166 (22), 152 (5), 151 (51), 148 (9), 147 (7), 137 (5), 135 (27), 134 (5), 133 (28), 124 (10), 123 (30), 122 (5), 121 (42), 120 (11), 119 (12), 117 (5), 115 (6), 110 (7), 109 (30), 108 (11), 107 (60), 106 (18), 105 (87), 103 (10), 98 (8), 97 (8), 96 (46), 95 (100), 94 (9), 93 (48), 92 (17), 91 (79), 89 (6), 88 (8), 83 (15), 82 (9), 81 (20), 80 (14), 79 (66), 78 (21), 77 (53), 71 (5), 70 (49), 69 (25), 68 (7), 67 (48), 66 (12), 65 (24), 63 (8), 59 (8), 57 (5), 56 (6), 55 (63), 54 (6), 53 (27), 52 (8), 51 (16).                                                                                       |
| <b>(+)-<math>\alpha</math>-Pinene<br/>(15)</b> | <b>u26</b> | 13.50 | 152 (5), 151 (34), 148 (8), 147 (7), 138 (8), 137 (56), 135 (12), 134 (8), 133 (63), 131 (5), 124 (15), 123 (100), 122 (13), 121 (17), 120 (13), 119 (46), 117 (5), 115 (8), 111 (10), 110 (22), 109 (37), 108 (35), 107 (33), 106 (13), 105 (56), 104 (6), 103 (11), 98 (5), 97 (23), 96 (14), 95 (100), 94 (13), 93 (32), 92 (11), 91 (60), 89 (5), 85 (6), 83 (21), 82 (19), 81 (36), 80 (11), 79 (59), 78 (19), 77 (79), 72 (7), 70 (12), 69 (45), 68 (11), 67 (73), 66 (13), 65 (27), 63 (9), 59 (21), 57 (11), 56 (15), 55 (61), 54 (12), 53 (34), 52 (8), 51 (25).                                                |
|                                                | <b>u27</b> | 15.00 | 166 (23), 152 (6), 151 (51), 148 (10), 147 (6), 138 (5), 135 (26), 133 (29), 124 (10), 123 (29), 122 (6), 121 (41), 120 (12), 119 (11), 117 (6), 115 (6), 110 (6), 109 (31), 108 (11), 107 (62), 106 (18), 105 (94), 103 (10), 98 (7), 97 (9), 96 (47), 95 (100), 94 (11), 93 (51), 92 (17), 91 (79), 88 (5), 83 (14), 82 (9), 81 (22), 80 (12), 79 (66), 78 (21), 77 (57), 71 (5), 70 (47), 69 (23), 68 (7), 67 (50), 66 (13), 65 (25), 63 (8), 59 (5), 56 (7), 55 (65), 54 (7), 53 (27), 52 (8), 51 (17).                                                                                                              |

| Supplementary Table S17. Authentic standards used listed by retention time |               |                                                |                                                  |             |                      |                      |         |        |
|----------------------------------------------------------------------------|---------------|------------------------------------------------|--------------------------------------------------|-------------|----------------------|----------------------|---------|--------|
| Product Name (number)                                                      | Supplier      | Formula                                        | Smiles                                           | Pubchem CID | Retention time (min) | Quality against NIST |         |        |
|                                                                            |               |                                                |                                                  |             |                      | Match                | R.Match | % Prob |
| (-)- <i>cis</i> -Limonene epoxide (50)                                     | Sigma-Aldrich | C <sub>10</sub> H <sub>16</sub> O              | <chem>CC(=C)[C@@H]1CC[C@@]2(C)OC2C1</chem>       | 6857487     | 9.04                 | 953                  | 966     | 40.5   |
| (+)- <i>cis</i> -Limonene epoxide (42)                                     | Sigma-Aldrich | C <sub>10</sub> H <sub>16</sub> O              | <chem>C[C@]12C(O2)C[C@H](C(C)=C)CC1</chem>       | 6432653     | 9.04                 | 941                  | 951     | 35     |
| (-)- <i>trans</i> -Limonene epoxide (49)                                   | Sigma-Aldrich | C <sub>10</sub> H <sub>16</sub> O              | <chem>C[C@@]12C(O2)C[C@H](C(C)=C)CC1</chem>      | 441245      | 9.15                 | 949                  | 957     | 49.9   |
| (+)- <i>trans</i> -Limonene epoxide (41)                                   | Sigma-Aldrich | C <sub>10</sub> H <sub>16</sub> O              | <chem>C[C@@]12C(O2)C[C@H](C(C)=C)CC1</chem>      | 6432449     | 9.15                 | 949                  | 958     | 50.3   |
| 2,6-Dimethyl-3,7-octadien-2-ol (20)                                        | Sigma-Aldrich | C <sub>10</sub> H <sub>18</sub> O <sub>2</sub> | <chem>CC(CC=CC(C)(C)O)C=C</chem>                 | 537103      | 9.3                  | 904                  | 905     | 79.1   |
| (+)-Dihydrocarbone (-) <sup>a</sup>                                        | Sigma-Aldrich | C <sub>10</sub> H <sub>16</sub> O              | <chem>CC1CCC(CC1=O)C(=C)C</chem>                 | 6432474     | 10.24                | 935                  | 938     | 43.8   |
| (S)- <i>cis</i> -Verbenol (65)                                             | Sigma-Aldrich | C <sub>10</sub> H <sub>16</sub> O              | <chem>CC1(C)[C@@H]2C[C@H]1[C@@H](O)C=C2C</chem>  | 87839       | 10.52                | 955                  | 960     | 30.9   |
| (-)- <i>trans</i> -Pinocarveol (60)                                        | Sigma-Aldrich | C <sub>10</sub> H <sub>16</sub> O              | <chem>CC1([C@H]2C[C@H]1C(=C)[C@@H](C2)O)C</chem> | 1201530     | 10.52                | 943                  | 964     | 45.3   |
| (-)-Verbenone (63)                                                         | Sigma-Aldrich | C <sub>10</sub> H <sub>14</sub> O              | <chem>CC1=CC(=O)C2CC1C2(C)C</chem>               | 29025       | 10.82                | 960                  | 960     | 49.1   |
| (-)- <i>trans</i> -Isopiperitenol (47)                                     | In-house      | C <sub>10</sub> H <sub>16</sub> O              | <chem>CC1=CC(C(CC1)C(=C)C)O</chem>               | 439410      | 11.04                | 954                  | 958     | 43.3   |
| (-)-Myrtenol (59)                                                          | Sigma-Aldrich | C <sub>10</sub> H <sub>16</sub> O              | <chem>CC1([C@H]2CC=C([C@@H]1C2)CO)C</chem>       | 88301       | 11.24                | 952                  | 953     | 52.4   |
| (-)-Myrtenal (-)                                                           | Sigma-Aldrich | C <sub>10</sub> H <sub>14</sub> O              | <chem>CC1([C@H]2CC=C([C@@H]1C2)C=O)C</chem>      | 1201529     | 11.36                | 938                  | 941     | 52.1   |
| di-pentene-dioxide (-)                                                     | Sigma-Aldrich | C <sub>10</sub> H <sub>16</sub> O <sub>2</sub> | <chem>CC12CCC(CC1O2)C3(CO3)C</chem>              | 232703      | 11.4                 | 893                  | 894     | 71.2   |
| (-)- <i>cis</i> -Carveol (45)                                              | Sigma-Aldrich | C <sub>10</sub> H <sub>16</sub> O              | <chem>CC1=CC[C@H](C[C@H]1O)C(=C)C</chem>         | 330573      | 11.42                | 961                  | 961     | 76.9   |
| di-pentene-dioxide (-)                                                     | Sigma-Aldrich | C <sub>10</sub> H <sub>16</sub> O <sub>3</sub> | <chem>CC12CCC(CC1O2)C3(CO3)C</chem>              | 232703      | 11.45                | 906                  | 906     | 74.7   |
| <i>p</i> -cymen-8-ol (29)                                                  | Sigma-Aldrich | C <sub>10</sub> H <sub>14</sub> O              | <chem>CC1=CC=C(C=C1)C(C)(C)O</chem>              | 14529       | 11.46                | 936                  | 936     | 70.3   |
| di-pentene-dioxide (-)                                                     | Sigma-Aldrich | C <sub>10</sub> H <sub>16</sub> O <sub>4</sub> | <chem>CC12CCC(CC1O2)C3(CO3)C</chem>              | 232703      | 11.48                | 884                  | 884     | 68.7   |
| (-)- <i>trans</i> -Carveol (-)                                             | Sigma-Aldrich | C <sub>10</sub> H <sub>16</sub> O              | <chem>CC(=C)[C@@H]1CC=C(C)[C@@H](O)C1</chem>     | 94221       | 11.56                | 962                  | 962     | 70     |
| <i>cis</i> -Myrtanol (-)                                                   | Sigma-Aldrich | C <sub>10</sub> H <sub>18</sub> O <sub>2</sub> | <chem>CC1([C@@H]2CC[C@H]1([C@H]2)CO)C</chem>     | 117419      | 11.62                | 944                  | 946     | 39.4   |
| 3-Caren-10-ol (41)                                                         | Chem-Space    | C <sub>10</sub> H <sub>16</sub> O              | <chem>OCC(CC12)=CCC2C1(C)C</chem>                | 9877427     | 11.93                | -                    | -       | -      |
| (1R,2R,5R)-(+)-2-Hydroxy-3-pinanone (-)                                    | Sigma-Aldrich | C <sub>10</sub> H <sub>16</sub> O <sub>2</sub> | <chem>CC1([C@@H]2C[C@H]1C(C(=O)C2)(C)O)C</chem>  | 12760081    | 11.99                | 938                  | 944     | 94.5   |

|                                           |               |                                                |                                     |          |       |     |     |      |
|-------------------------------------------|---------------|------------------------------------------------|-------------------------------------|----------|-------|-----|-----|------|
| (1S,2S,5S)-(+)-2-Hydroxy-3-pinanone (-)   | Sigma-Aldrich | C <sub>10</sub> H <sub>16</sub> O <sub>3</sub> | C[C@@]1([C@H]2C[C@H](C2(C)C)CC1=O)O | 11126668 | 11.99 | 944 | 952 | 94.5 |
| (-)-Perillyl alcohol ( <b>44</b> )        | Sigma-Aldrich | C <sub>10</sub> H <sub>16</sub> O              | CC(=C)C1CCC(=CC1)CO                 | 10819    | 12.17 | 933 | 941 | 49.5 |
| <i>p</i> -Cymen-7-ol ( <b>27</b> )        | Sigma-Aldrich | C <sub>10</sub> H <sub>14</sub> O              | CC(C)C1=CC=C(C=C1)CO                | 325      | 12.55 | 942 | 942 | 75.3 |
| Thymol ( <b>26</b> )                      | Sigma-Aldrich | C <sub>10</sub> H <sub>14</sub> O              | CC1=CC(=C(C=C1)C(C)C)O              | 6989     | 12.82 | 945 | 945 | 58.7 |
| Carvacrol ( <b>25</b> )                   | Sigma-Aldrich | C <sub>10</sub> H <sub>14</sub> O              | CC1=C(C=C(C=C1)C(C)C)O              | 10364    | 12.94 | 937 | 937 | 35.2 |
| Sobrerol ( <b>33</b> )                    | Sigma-Aldrich | C <sub>10</sub> H <sub>18</sub> O <sub>2</sub> | CC1=CCC(CC1O)C(C)C)O                | 91463    | 13.34 | 920 | 923 | 69.7 |
| 7-hydroxy-terpineol ( <b>32</b> )         | Chem-Space    | C <sub>10</sub> H <sub>18</sub> O <sub>2</sub> | CC(C)(O)C1CCC(CO)=CC1               | 110662   | 14.13 | -   | -   | -    |
| <sup>a</sup> (-): no number was assigned. |               |                                                |                                     |          |       |     |     |      |

| Supplementary Table S18. Product identification against NIST MS Library and/or authentic standards |                      |                                                |                                                |                                             |             |                           |                                  |          |        |          |
|----------------------------------------------------------------------------------------------------|----------------------|------------------------------------------------|------------------------------------------------|---------------------------------------------|-------------|---------------------------|----------------------------------|----------|--------|----------|
| Substrate                                                                                          | Retention time (min) | Identified product                             | Formula                                        | Smiles                                      | Pubchem CID | Empirical retention index | Match parameters on NIST Library |          |        | ID Level |
|                                                                                                    |                      |                                                |                                                |                                             |             |                           | Match                            | R. Match | % Prob |          |
| (R/S)-Linalool (1)                                                                                 | 9.28                 | <i>trans</i> -Linalool oxide (18)              | C <sub>10</sub> H <sub>18</sub> O <sub>2</sub> | <chem>C[C@]1(CC[C@H](O1)C(C)(C)O)C=C</chem> | 6432254     | 1621                      | 961                              | 961      | 42.3   | 2        |
|                                                                                                    | 9.76                 | Dihydrolinalool (17)                           | C <sub>10</sub> H <sub>20</sub> O              | <chem>CCC(C)(CCC=C(C)C)O</chem>             | 86749       | 1546                      | 870                              | 922      | 85.4   | 2        |
|                                                                                                    | 10.96                | ( <i>trans</i> )-Pyranoid linalool oxide       | C <sub>10</sub> H <sub>18</sub> O <sub>2</sub> | <chem>CC1(C(CCC(O1)(C)C=C)O)C</chem>        | 6427788     | 1764                      | 896                              | 915      | 73.5   | 2        |
|                                                                                                    | 11.07                | ( <i>trans</i> )-Pyranoid linalool oxide       | C <sub>10</sub> H <sub>18</sub> O <sub>2</sub> | <chem>CC1(C(CCC(O1)(C)C=C)O)C</chem>        | 6427788     | 1859                      | 911                              | 913      | 62.8   | 2        |
|                                                                                                    | 13.29                | 8-Hydroxylinalool (16)                         | C <sub>10</sub> H <sub>16</sub> O              | <chem>CC(=CCCC(C)(C=O)O)CO</chem>           | 5280678     | 2000                      | 954                              | 955      | 86.8   | 2        |
| (E/Z)-β-Ocimene (2)                                                                                | 9.24                 | (Z)-Myroxide (22)                              | C <sub>10</sub> H <sub>16</sub> O              | <chem>C/C(=C/CC1C(O1)(C)C)/C=C</chem>       | 94648       | 1582                      | 941                              | 948      | 76.7   | 2        |
|                                                                                                    | 9.4                  | (E)-Myroxide (21)                              | C <sub>10</sub> H <sub>16</sub> O              | <chem>C\C(C=C)=C/CC1OC1(C)C</chem>          | 94648       | 1884                      | 919                              | 922      | 54.4   | 2        |
|                                                                                                    | 11.32                | (3E,5E)-2,6-Dimethyl-3,5,7-octatrien-2-ol (20) | C <sub>10</sub> H <sub>16</sub> O              | <chem>CC(=CC=CC(C)(C)O)C=C</chem>           | 5363695     | 1817                      | 889                              | 895      | 37.5   | 2        |
| Geraniol (3)                                                                                       | 13.41                | Geranic acid (24)                              | C <sub>10</sub> H <sub>16</sub> O <sub>2</sub> | <chem>CC(=CCCC(=CC(=O)O)O)C</chem>          | 5275520     | 2000                      | 922                              | 947      | 49.8   | 2        |
|                                                                                                    | 14.6                 | 8-hydroxygeraniol (23)                         | C <sub>10</sub> H <sub>18</sub> O <sub>2</sub> | <chem>CC(=CCO)CCC=C(C)CO</chem>             | 5363397     | 2000                      | 969                              | 976      | 89     | 2        |
| (R)-Limonene (7)                                                                                   | 9.05                 | <i>cis</i> -(-)-1,2-limonene epoxide (42)      | C <sub>10</sub> H <sub>16</sub> O              | <chem>C[C@]12C(O2)C[C@H](C(C)=C)CC1</chem>  | 6857487     | 1467                      | 947                              | 956      | 38.8   | 1        |
|                                                                                                    | 9.16                 | (+)- <i>trans</i> -Limonene 1,2-epoxide (41)   | C <sub>10</sub> H <sub>16</sub> O              | <chem>C[C@@]12C(O2)C[C@H](C(C)=C)CC1</chem> | 441245      | 1514                      | 941                              | 950      | 54.6   | 1        |
|                                                                                                    | 10.24                | D-Dihydrocarvone                               | C <sub>10</sub> H <sub>16</sub> O              | <chem>CC1CCC(CC1=O)C(=C)C</chem>            | 24473       | 1603                      | 808                              | 837      | 38.4   | 1        |

|                              |       |                                                    |                                                |                                     |          |      |     |     |      |   |
|------------------------------|-------|----------------------------------------------------|------------------------------------------------|-------------------------------------|----------|------|-----|-----|------|---|
|                              | 10.25 | <i>trans</i> -d-hydrocarvone                       | C <sub>10</sub> H <sub>16</sub> O              | C[C@H]1CC[C@@H](CC1=O)C(C)C         | 6432474  | 1606 | 951 | 953 | 58.2 | 2 |
|                              | 11.03 | (-)- <i>cis</i> -Isopiperitenol ( <b>40</b> )      | C <sub>10</sub> H <sub>16</sub> O              | CC1=C[C@H]([C@H](CC1)C(=C)C)O       | 12311192 | 1810 | 956 | 956 | 64.3 | 2 |
|                              | 11.05 | (-)- <i>trans</i> -Isopiperitenol ( <b>39</b> )    | C <sub>10</sub> H <sub>16</sub> O              | CC1=C[C@@H]([C@H](CC1)C(=C)C)O      | 439410   | 1830 | 957 | 959 | 43.2 | 1 |
|                              | 11.22 | Perillyl aldehyde (-)                              | C <sub>10</sub> H <sub>14</sub> O              | CC(=C)C1CCC(=CC1)C=O                | 16441    | 2751 | 944 | 945 | 65.1 | 2 |
|                              | 11.57 | <i>trans</i> -Carveol ( <b>37</b> )                | C <sub>10</sub> H <sub>16</sub> O              | CC1=CC[C@@H](C[C@H]1O)C(=C)C        | 443178   | 2003 | 932 | 932 | 48.7 | 1 |
|                              | 12.19 | Perillyl alcohol ( <b>36</b> )                     | C <sub>10</sub> H <sub>16</sub> O              | CC(=C)C1CCC(=CC1)CO                 | 10819    | 2000 | 938 | 941 | 48.2 | 1 |
|                              | 13.18 | Limonene-1,2-diol ( <b>35</b> )                    | C <sub>10</sub> H <sub>18</sub> O <sub>2</sub> | CC(=C)C1CCC(C(C1)O)(C)O             | 94217    | 2000 | 910 | 923 | 83.7 | 2 |
| (S)-Limonene<br>( <b>8</b> ) | 9.05  | <i>cis</i> -(-)-1,2-limonene epoxide ( <b>50</b> ) | C <sub>10</sub> H <sub>16</sub> O              | CC(=C)[C@@H]1CC[C@@]2(C(C1)O2)C     | 6857487  | 1467 | 939 | 939 | 33.5 | 1 |
|                              | 9.16  | <i>trans</i> -Limonene epoxide ( <b>49</b> )       | C <sub>10</sub> H <sub>16</sub> O              | CC(=C)[C@@H]1CC[C@]2([C@@H](C1)O2)C | 6432449  | 1514 | 958 | 968 | 49.6 | 1 |
|                              | 11.03 | (-)- <i>cis</i> -Isopiperitenol ( <b>48</b> )      | C <sub>10</sub> H <sub>16</sub> O              | CC1=C[C@H]([C@H](CC1)C(=C)C)O       | 12311192 | 1810 | 945 | 945 | 65.3 | 2 |
|                              | 11.05 | (-)- <i>trans</i> -Isopiperitenol ( <b>47</b> )    | C <sub>10</sub> H <sub>16</sub> O              | CC1=C[C@@H]([C@H](CC1)C(=C)C)O      | 439410   | 1830 | 948 | 948 | 38.4 | 1 |
|                              | 11.22 | Perillyl aldehyde (-)                              | C <sub>10</sub> H <sub>14</sub> O              | CC(=C)C1CCC(=CC1)C=O                | 16441    | 2751 | 939 | 943 | 63.1 | 2 |
|                              | 11.42 | <i>cis</i> -Carveol ( <b>46</b> )                  | C <sub>10</sub> H <sub>16</sub> O              | CC(=C)[C@@H]1CC=C(C)[C@H](O)C1      | 330573   | 1854 | 880 | 884 | 43.1 | 1 |
|                              | 11.48 | α-Limonene diepoxide ( <b>45</b> )                 | C <sub>10</sub> H <sub>16</sub> O              | CC12CCC(CC1O2)C3(CO3)C              | 232703   | 1891 | 895 | 922 | 65.3 | 2 |
|                              | 11.88 | <i>trans</i> -Shisool (-)                          | C <sub>10</sub> H <sub>18</sub> O              | CC(=C)C1CCC(CC1)CO                  | 519954   | 1966 | 901 | 912 | 34.1 | 2 |

|                             |       |                                                 |                                                |                         |         |      |     |     |      |   |
|-----------------------------|-------|-------------------------------------------------|------------------------------------------------|-------------------------|---------|------|-----|-----|------|---|
|                             | 12.18 | Perillyl alcohol ( <b>44</b> )                  | C <sub>10</sub> H <sub>16</sub> O              | CC(=C)C1CCC(=CC1)CO     | 10819   | 2000 | 936 | 938 | 50.9 | 1 |
|                             | 13.18 | Limonene-1,2-diol ( <b>43</b> )                 | C <sub>10</sub> H <sub>18</sub> O <sub>2</sub> | CC(=C)C1CCC(C(C1)O)(C)O | 94217   | 2000 | 861 | 879 | 70.2 | 2 |
| γ-Terpinene<br>( <b>4</b> ) | 6.49  | <i>p</i> -cymene                                | C <sub>10</sub> H <sub>14</sub>                | CC1=CC=C(C=C1)C(C)C     | 7463    | 1368 | 923 | 923 | 14.7 | 2 |
|                             | 8.96  | <i>p</i> -cymenene                              | C <sub>10</sub> H <sub>12</sub>                | CC1=CC=C(C=C1)C(=C)C    | 62385   | 1445 | 938 | 941 | 19.7 | 2 |
|                             | 11.19 | 4-Isopropylbenzaldehyde<br>( <b>31</b> )        | C <sub>10</sub> H <sub>12</sub> O              | CC(C)C1=CC=C(C=C1)C=O   | 326     | 2309 | 945 | 958 | 35.7 | 2 |
|                             | 11.28 | 1,4- <i>p</i> -Menthadien-7-al ( <b>30</b> )    | C <sub>10</sub> H <sub>14</sub> O              | CC(C)C1=CCC(=CC1)C=O    | 6429112 | 1806 | 923 | 928 | 54.5 | 2 |
|                             | 11.47 | <i>p</i> -Cymen-8-ol ( <b>29</b> )              | C <sub>10</sub> H <sub>14</sub> O              | CC1=CC=C(C=C1)C(C)(C)O  | 14529   | 1888 | 958 | 958 | 73.3 | 1 |
|                             | 12.37 | <i>p</i> -Mentha-1,4-dien-7-ol<br>( <b>28</b> ) | C <sub>10</sub> H <sub>16</sub> O              | CC(C)C1=CCC(=CC1)CO     | 519966  | 2000 | 956 | 953 | 84.9 | 2 |
|                             | 12.55 | <i>p</i> -Cymen-7-ol ( <b>27</b> )              | C <sub>10</sub> H <sub>14</sub> O              | CC(C)C1=CC=C(C=C1)CO    | 325     | 2000 | 939 | 939 | 71.7 | 1 |
|                             | 12.83 | Thymol ( <b>26</b> )                            | C <sub>10</sub> H <sub>14</sub> O              | CC1=CC(=C(C=C1)C(C)C)O  | 6989    | 2000 | 922 | 925 | 40.9 | 1 |
|                             | 12.95 | Carvacrol ( <b>25</b> )                         | C <sub>10</sub> H <sub>14</sub> O              | CC1=C(C=C(C=C1)C(C)C)O  | 10364   | 2000 | 936 | 939 | 38.6 | 1 |
| Terpinolene<br>( <b>6</b> ) | 8.85  | <i>p</i> -Mentha-1,5,8-triene (-)               | C <sub>10</sub> H <sub>14</sub>                | CC1=CCC(C=C1)C(=C)C     | 527424  | 1424 | 912 | 916 | 50.2 | 2 |
|                             | 12.53 | <i>p</i> -Menthadien-7-ol ( <b>34</b> )         | C <sub>10</sub> H <sub>16</sub> O              | CC(C)C1=CC=C(CC1)CO     | 556567  | 2000 | 854 | 858 | 54   | 2 |
| α-Terpineol ( <b>5</b> )    | 13.35 | Sobrerol                                        | C <sub>10</sub> H <sub>18</sub> O <sub>2</sub> | CC1=CCC(CC1O)C(C)(C)O   | 91463   | 2000 | 849 | 856 | 50   | 1 |
|                             | 14.14 | 7-hydroxy-terpineol                             | C <sub>10</sub> H <sub>16</sub> O <sub>2</sub> | CC(C)(O)C1CCC(CO)=CC1   | 110662  | 2000 | -   | -   | -    | 1 |



|                                |       |                                        |                                                |                                    |               |       |     |     |      |   |
|--------------------------------|-------|----------------------------------------|------------------------------------------------|------------------------------------|---------------|-------|-----|-----|------|---|
| 1,8-cineole<br>(10)            | 11.55 | 2-Hydroxycineole                       | C <sub>10</sub> H <sub>18</sub> O <sub>2</sub> | CC1(C2CCC(O1)(C(C2)O)C)C           | 529885        | 1983  | 956 | 957 | 78.9 | 2 |
|                                | 11.78 | 3-exo-Hydroxy-1,8-cineole              | C <sub>10</sub> H <sub>18</sub> O <sub>2</sub> | CC1(C2CCC(O1)(CC2O)C)C             | 10214946<br>3 | 1920  | 888 | 900 | 95.6 | 2 |
| (+) -Car-3-ene<br>(9)          | 6.48  | <i>p</i> -cymene                       | C <sub>10</sub> H <sub>14</sub>                | CC1=CC=C(C=C1)C(C)C                | 7463          | 1368  | 914 | 919 | 16.7 | 1 |
|                                | 10.85 | <i>p</i> -Mentha-1,5-dien-8-ol<br>(55) | C <sub>10</sub> H <sub>16</sub> O              | CC1=CCC(C=C1)C(C)(C)O              | 519323        | 1719  | 936 | 946 | 93.2 | 2 |
|                                | 10.89 | <i>p</i> -Mentha-1,5-dien-8-ol<br>(55) | C <sub>10</sub> H <sub>16</sub> O              | CC1=CCC(C=C1)C(C)(C)O              | 519323        | 1734  | 923 | 928 | 90.9 | 2 |
|                                | 11.44 | <i>m</i> -Cymen-8-ol (53)              | C <sub>10</sub> H <sub>14</sub> O              | CC1=CC(=CC=C1)C(C)(C)O             | 255195        | 1869  | 914 | 918 | 39.6 | 2 |
|                                | 11.87 | Car-3-en-5-one (52)                    | C <sub>10</sub> H <sub>14</sub> O              | CC1=CC(=O)C2C(C1)C2(C)C            | 13502875      | 1961  | 881 | 910 | 35.4 | 1 |
|                                | 11.93 | 3-Caren10-ol (51)                      | C <sub>10</sub> H <sub>16</sub> O              | OCC(CC12)=CCC2C1(C)C               | 9877427       | 2026  | -   | -   | -    | 1 |
|                                | 12.5  | <i>p</i> -Cymen-7-ol (-)               | C <sub>10</sub> H <sub>14</sub> O              | CC(C)C1=CC=C(C=C1)CO               | 325           | 2000  | 862 | 866 | 54   | 2 |
| Fenchol (11)                   | 8.54  | Fenchone (-)                           | C <sub>10</sub> H <sub>16</sub> O              | CC1(C2CCC(C2)(C1=O)C)C             | 14525         | 2094  | 897 | 925 | 71.1 | 2 |
| (+) - $\alpha$ -Pinene<br>(15) | 10.37 | (1R)-(-)-Myrtenal (-)                  | C <sub>10</sub> H <sub>14</sub> O              | CC1([C@H]2CC=C([C@@H]1C2)C=O)C     | 1201529       | 1639  | 876 | 876 | 43.4 | 2 |
|                                | 10.54 | <i>cis</i> -Verbenol (68)              | C <sub>10</sub> H <sub>16</sub> O              | CC1=C[C@H](O)[C@H]2C[C@@H]1C2(C)C  | 87839         | 1746  | 965 | 965 | 39.9 | 2 |
|                                | 10.67 | <i>trans</i> -verbenol (67)            | C <sub>10</sub> H <sub>16</sub> O              | CC1=C[C@@H](O)[C@H]2C[C@@H]1C2(C)C | 89664         | 2038  | 954 | 962 | 54.5 | 1 |
|                                | 10.83 | (-)-Verbenone (66)                     | C <sub>10</sub> H <sub>14</sub> O              | CC1=CC(=O)C2CC1C2(C)C              | 29025         | 1714  | 961 | 961 | 45   | 2 |
|                                | 11.26 | (-)-Myrtenol (61)                      | C <sub>10</sub> H <sub>16</sub> O              | CC1(C2CC=C(C1C2)CO)C               | 88301         | 22569 | 932 | 934 | 48.5 | 1 |

|                                        |       |                                         |                                                |                                      |          |      |     |     |      |   |
|----------------------------------------|-------|-----------------------------------------|------------------------------------------------|--------------------------------------|----------|------|-----|-----|------|---|
|                                        | 13.36 | Sobrerol ( <b>33</b> )                  | C <sub>10</sub> H <sub>18</sub> O <sub>2</sub> | CC1=CCC(CC1O)C(C)(C)O                | 91463    | 2000 | 915 | 919 | 69   | 2 |
| (-)- $\alpha$ -pinene<br>( <b>14</b> ) | 10.53 | <i>cis</i> -verbenol ( <b>65</b> )      | C <sub>10</sub> H <sub>16</sub> O              | CC1=C[C@@H](O)[C@@H]2C[C@H]1C2(C)C   | 87839    | 1735 | 961 | 961 | 36.5 | 1 |
|                                        | 10.66 | <i>trans</i> -verbenol ( <b>64</b> )    | C <sub>10</sub> H <sub>16</sub> O              | CC1(C)[C@@H]2C[C@H]1[C@@H](O)C=C2C   | 89664    | 1992 | 936 | 650 | 53.6 | 1 |
|                                        | 10.83 | (-)-Verbenone ( <b>63</b> )             | C <sub>10</sub> H <sub>14</sub> O              | CC1[C@@H](C(C)=C2)C[C@H]1C2=O        | 29025    | 1714 | 959 | 960 | 45.2 | 2 |
|                                        | 11.24 | (-)-Myrtenol ( <b>59</b> )              | C <sub>10</sub> H <sub>16</sub> O              | CC1(C)[C@H]2C[C@@H]1C(CO)=CC2        | 10582    | 4429 | 781 | 822 | 19   | 1 |
|                                        | 12    | Camphostene (-)                         | C <sub>10</sub> H <sub>16</sub> O <sub>2</sub> | CC1(C)C2CC1C(C)(O)C(=O)C2            | 112005   | 2114 | 845 | 899 | 83.4 | 1 |
|                                        | 13.36 | Sobrerol ( <b>33</b> )                  | C <sub>10</sub> H <sub>18</sub> O <sub>2</sub> | CC1=CCC(CC1O)C(C)(C)O                | 91463    | 2000 | 923 | 926 | 70.7 | 1 |
| (+) - $\beta$ -Pinene<br>( <b>13</b> ) | 10.53 | <i>trans</i> -Pinocarveol ( <b>62</b> ) | C <sub>10</sub> H <sub>16</sub> O              | CC1(C)C2CC1C(=C)[C@H](O)C2           | 1201530  | 1739 | 935 | 936 | 41.2 | 2 |
|                                        | 11.24 | Myrtenol ( <b>61</b> )                  | C <sub>10</sub> H <sub>16</sub> O              | CC1(C)[C@H]2C[C@@H]1C(CO)=CC2        | 10582    | 4869 | 929 | 939 | 49.2 | 2 |
|                                        | 11.58 | (-)- <i>cis</i> -Myrtanol (-)           | C <sub>10</sub> H <sub>18</sub> O              | CC1(C)C2CC1C(CO)CC2                  | 11084102 | 2046 | 918 | 948 | 32.4 | 1 |
|                                        | 12.18 | Perillyl alcohol ( <b>58</b> )          | C <sub>10</sub> H <sub>16</sub> O              | CC(=C)C1CCC(CO)=CC1                  | 10819    | 2000 | 933 | 938 | 67.3 | 1 |
|                                        | 12.53 | <i>p</i> -Menthadien-7-ol ( <b>34</b> ) | C <sub>10</sub> H <sub>16</sub> O              | CC(C)C1=CC=C(CC1)CO                  | 556567   | 2000 | 849 | 851 | 51.4 | 2 |
|                                        | 14.14 | 7-hydroxy-terpineol ( <b>32</b> )       | C <sub>10</sub> H <sub>16</sub> O <sub>2</sub> | CC(C)(O)C1CCC(CO)=CC1                | 110662   | 2000 | -   | -   | -    | 1 |
| (-)- $\beta$ -Pinene<br>( <b>12</b> )  | 10.53 | L-Pinocarveol ( <b>60</b> )             | C <sub>10</sub> H <sub>16</sub> O              | CC1([C@H]2C[C@@H]1C(=C)[C@@H](C2)O)C | 1201530  | 1634 | 941 | 962 | 47.6 |   |
|                                        | 11.24 | Myrtenol ( <b>59</b> )                  | C <sub>10</sub> H <sub>16</sub> O              | CC1(C)[C@H]2C[C@@H]1C(CO)=CC2        | 10582    | 4462 | 902 | 903 | 47.8 | 1 |

|                                                                                                                                                      |       |                                         |                                                |                                    |          |      |     |     |      |   |
|------------------------------------------------------------------------------------------------------------------------------------------------------|-------|-----------------------------------------|------------------------------------------------|------------------------------------|----------|------|-----|-----|------|---|
|                                                                                                                                                      | 11.58 | (-)- <i>cis</i> -Myrtanol (-)           | C <sub>10</sub> H <sub>18</sub> O              | <chem>CC1(C)C2CC1C(CO)CC2</chem>   | 11084102 | 2046 | 872 | 918 | 38.9 | 2 |
|                                                                                                                                                      | 12.18 | Perillyl alcohol ( <b>58</b> )          | C <sub>10</sub> H <sub>16</sub> O              | <chem>CC(=C)C1CCC(=CC1)CO</chem>   | 10819    | 2000 | 918 | 939 | 51.5 | 2 |
|                                                                                                                                                      | 12.53 | <i>p</i> -Menthadien-7-ol ( <b>34</b> ) | C <sub>10</sub> H <sub>16</sub> O              | <chem>CC(C)C1=CC=C(CC1)CO</chem>   | 556567   | 2000 | 856 | 864 | 52.5 | 1 |
|                                                                                                                                                      | 14.14 | 7-hydroxy-terpineol ( <b>32</b> )       | C <sub>10</sub> H <sub>16</sub> O <sub>2</sub> | <chem>CC(C)(O)C1CCC(CO)=CC1</chem> | 110662   | 2000 | -   | -   | -    | 1 |
| Product identification was done at different levels (ID Level): 1, identification against authentic standard; 2, identification against NIST Library |       |                                         |                                                |                                    |          |      |     |     |      |   |

## Supplementary Methods

| <b>Supplementary Table S19. Basic information about primers</b> |                    |                          |                                 |                                       |                                |
|-----------------------------------------------------------------|--------------------|--------------------------|---------------------------------|---------------------------------------|--------------------------------|
| <b>Primer name</b>                                              | <b>Application</b> | <b>Product Size (bp)</b> | <b>Template</b>                 | <b>Mutagenesis</b>                    |                                |
| pJ6411_Fw                                                       | Inverse PCR        | 3749bp                   | pJBEI-6411                      |                                       |                                |
| pJ6411_Rv                                                       | Inverse PCR        | 3749bp                   | pJBEI-6411                      |                                       |                                |
| P450 <sub>cam</sub> +O_Fw                                       | PCR & OE-PCR       | 1315bp & 2925bp          | pETM11                          |                                       |                                |
| P450 <sub>cam</sub> +O_Rv                                       | PCR & OE-PCR       | 1315bp & 2925bp          | pETM11                          |                                       |                                |
| PdR_Fw                                                          | PCR & OE-PCR       | 1269bp & 2925bp          | pET21b                          |                                       |                                |
| PdR_Rv                                                          | PCR & OE-PCR       | 1269bp & 2925bp          | pET21b                          |                                       |                                |
| PdX+O_Fw                                                        | PCR & OE-PCR       | 318bp & 2925bp           | pETM11                          |                                       |                                |
| PdX+O_Rv                                                        | PCR & OE-PCR       | 318bp & 2925bp           | pETM11                          |                                       |                                |
| Fusion_Fw                                                       | OE-PCR             | 2925bp                   | P450 variant                    |                                       |                                |
| Fusion_Rv                                                       | OE-PCR             | 2925bp                   | P450 variant                    |                                       |                                |
| P450 <sub>BM3</sub> +O_Fw                                       | PCR & OE-PCR       | 3206 bp & 6955 bp        | pET15b                          |                                       |                                |
| P450 <sub>BM3</sub> +O_Rv                                       | PCR & OE-PCR       | 30206 bp & 6955 bp       | pET15b                          |                                       |                                |
| P450 <sub>cam</sub> <sup>-</sup> seq_Fw                         | Sequencing         | nd                       | pJBEI-P450 <sub>cam</sub>       |                                       |                                |
| P450 <sub>cam</sub> <sup>-</sup> seq_Rv                         | Sequencing         | nd                       | pJBEI-P450 <sub>cam</sub>       |                                       |                                |
| pBbseq_Rv                                                       | Sequencing         | nd                       | pJBEI-P450 <sub>cam</sub>       |                                       |                                |
| Y96F                                                            | Mutagenesis        | 6626 bp                  | Wt-P450 <sub>cam</sub>          |                                       | Y96F-P450 <sub>cam</sub>       |
| V447L_1                                                         | Mutagenesis        | 6626 bp                  | Y96F-P450 <sub>cam</sub>        |                                       | Y96F-V247L-P450 <sub>cam</sub> |
| F87W                                                            | Mutagenesis        | 6626 bp                  | Y96F-V247L-P450 <sub>cam</sub>  | F87W- Y96F-V247L-P450 <sub>cam</sub>  |                                |
| L244A                                                           | Mutagenesis        | 6626 bp                  | Y96F-P450 <sub>cam</sub>        | Y96F- L244A-P450 <sub>cam</sub>       |                                |
| F87W                                                            | Mutagenesis        | 6626 bp                  | Y96F-L244A-P450 <sub>cam</sub>  | F87W-Y96F-L244A-P450 <sub>cam</sub>   |                                |
| V247A                                                           | Mutagenesis        | 6626 bp                  | Y96F-L244A-P450 <sub>cam</sub>  | Y96F-L244A-V247A-P450 <sub>cam</sub>  |                                |
| V247F                                                           | Mutagenesis        | 6626 bp                  | Y96F-L244A-P450 <sub>cam</sub>  | Y96F-L244A-V247F-P450 <sub>cam</sub>  |                                |
| V247L_2                                                         | Mutagenesis        | 6626 bp                  | Y96F-L244A-P450 <sub>cam</sub>  | Y96F-L244A-V247L-P450 <sub>cam</sub>  |                                |
| A328V                                                           | Mutagenesis        | 7075 bp                  | Wt-P450 <sub>BM3</sub>          | A328V-P450 <sub>BM3</sub>             |                                |
| A264V                                                           | Mutagenesis        | 7075 bp                  | A328V-P450 <sub>BM3</sub>       | A624V-A328V-P450 <sub>BM3</sub>       |                                |
| L437F                                                           | Mutagenesis        | 7075 bp                  | A264V-A328V-P450 <sub>BM3</sub> | A264V-A328V-L437F-P450 <sub>BM3</sub> |                                |

nd= not defined.

| <b>Supplementary Table S20. Primers sequences.</b> |                                                             |
|----------------------------------------------------|-------------------------------------------------------------|
| <b>Primer name</b>                                 | <b>Sequence 5'-3'</b>                                       |
| pJ6411_Fw                                          | TAAGGATCCAAACTCGAGTAAGG                                     |
| pJ6411_Rv                                          | CCTAGATCTTTTGAATTCCCAA                                      |
| P450 <sub>cam</sub> +O_Fw                          | TTGGGAATTCAAAAGATCTAGGAGGATAAAGAAATGACCACCGAAACCATTGAGA     |
| P450 <sub>cam</sub> +O_Rv                          | ACGTTATCATTGGCGTTCATTTCTTATCCTCCTTTAAACTGCTTTGGTGGTTGC      |
| PdR_Fw                                             | ATGAACGCCAATGATAACGT                                        |
| PdR_Rv                                             | TTATGCGCTGCTCAGTTCTG                                        |
| PdX+O_Fw                                           | CAGAACTGAGCAGCGCATAAAGGAGGATAAAGAAATGAGCAAAGTTGTTTATGTTAGCC |
| PdX+O_Rv                                           | CCTTACTCGAGTTTGGATCCTTATTACCACTGACGATCCGGAA                 |
| Fusion_Fw                                          | TTGGGAATTCAAAAGATCTAGG                                      |
| Fusion_Rv                                          | CCTTACTCGAGTTTGGATCCTTA                                     |
| P450 <sub>cam</sub> +O_Fw                          | TTGGGAATTCAAAAGATCTAGGAGGATAAAGAAATGACAATTAAGAAATGCCTCAG    |
| P450 <sub>cam</sub> +O_Rv                          | CCTTACTCGAGTTTGGATCCTTATTACCCAGCCCACACGTCT                  |
| P450 <sub>cam</sub> -seq_Fw                        | ACCGAAGATTATGCAGAACCG                                       |
| P450 <sub>cam</sub> -seq_Rv                        | CTGTACCCGGTTTCTGACGA                                        |
| pBbseq_Rv                                          | CTCTAGTAGAGAGCGTTCAC                                        |
| Y96F                                               | GAAGCCGGTGAAGCCTTTGATTTTATTCCGACCAGC                        |
| V447L_1                                            | GTGGTCTGCTGCTGCTTGGTGGTCTGGATACC                            |
| F87W                                               | GCAGCGAATGTCCGTGGATTCCGCGTGAAGCCG                           |
| L244A                                              | GCAAACGTATGTGTGGTGCCTGCTGGTTGGTGGTC                         |
| V247L_2                                            | GGTGCCTGCTGCTTGGTGGTCTGG                                    |
| V247A                                              | GGTGCCTGCTGGCTGGTGGTCTGGATACC                               |
| V247F                                              | GGTGCCTGCTGTTTGGTGGTCTGGATACC                               |
| A328V                                              | CGCTTATGGCCAACTGTTCTGCGTTTTCCCTATATGC                       |
| A264V                                              | GCTGCCTTATGGCCAACTTTTCTGCGTTTTCCCTATATGC                    |
| L437F                                              | CTACGAGCTGGATATTAAGAACTTTCACGTTAAAACCTGAAG                  |

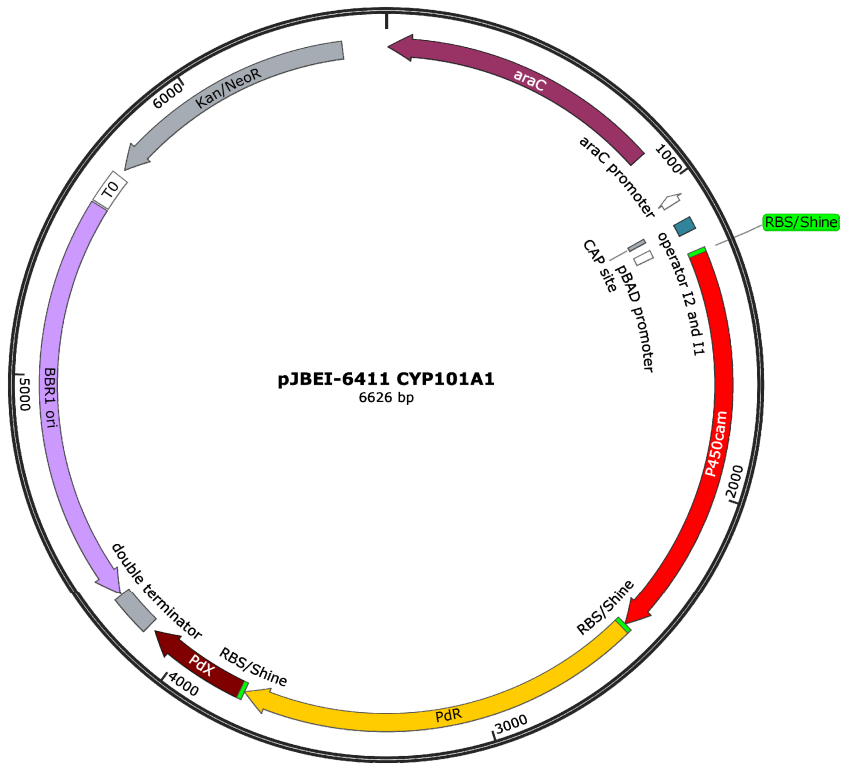

Supplementary Figure S16. pJBEI-6411 construct map.
